# Supplementary material for: A DFT-based mechanistic proposal for the light-driven insertion of dioxygen into Pt(ii)–C bonds
Source: Royal Society of Chemistry journal article supplement (doi:10.1039/c8sc01161c), 2018-01-01
Supplement: c8sc01161c1.pdf [file c8sc01161c1.pdf]

*Electronic Supplementary Information*

**A DFT-Based Mechanistic Proposal for the Light-Driven Insertion Of  
Dioxygen Into A Pt(II)-C Bond**

Victor M. Fernandez-Alvarez,<sup>1</sup> Sarah K. Y. Ho,<sup>2</sup> George J. P. Britovsek,<sup>2</sup> Feliu  
Maseras<sup>1,3\*</sup>

<sup>1</sup> *Institute of Chemical Research of Catalonia. The Barcelona Institute for Science and  
Technology. Av. Paisos Catalans, 16, Tarragona 43007, Catalonia, Spain*

<sup>2</sup> *Department of Chemistry, Imperial College London, Exhibition Road, South Kensington,  
London SW7 2AY (UK)*

<sup>3</sup> *Departament de Química, Universitat Autònoma de Barcelona, 08193 Bellaterra, Catalonia,  
Spain*

**Contents**

|                                                                              |            |
|------------------------------------------------------------------------------|------------|
| <i>S.1 Dinuclear mechanism.....</i>                                          | <i>S2</i>  |
| <i>S.2 High energy points with different basis sets.....</i>                 | <i>S3</i>  |
| <i>S.3 Oxygen coordination.....</i>                                          | <i>S3</i>  |
| <i>S.4 Synthesis of palladium complexes analogous to 4.....</i>              | <i>S4</i>  |
| <i>S.5 UV-VIS experimental spectra for all complexes.....</i>                | <i>S7</i>  |
| <i>S.5 Computed Excitations of all complexes.....</i>                        | <i>S8</i>  |
| <i>S.6 Cartesian coordinates of intermediates and transition states.....</i> | <i>S12</i> |

### S.1 Dinuclear Mechanism

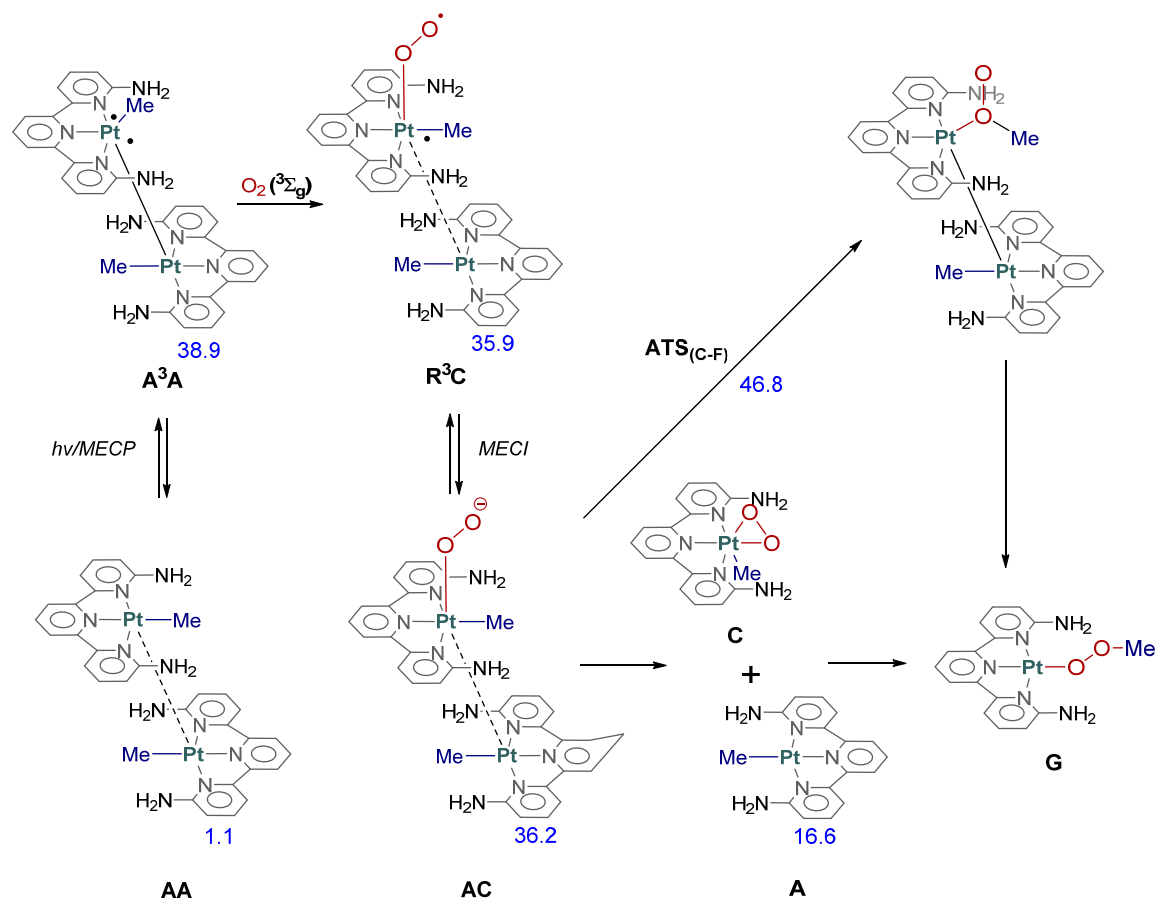

Figure S1. Free energy profile for the dinuclear methyl exchange M06/6-31G(d)/Lan12dz(f). All energies in kcal/mol.

The mechanism originally proposed by some of us consisted in the formation of bimolecular adducts which can show a CT band to create a vacancy for dioxygen to occupy. However, TD-DFT calculations found that the vertical spectrum of the dimer is very similar to that of the monomer. In addition, the complex RInt<sub>1b</sub> can dissociate singlet oxygen without a significant barrier to return to reactants, showing no competitive formation of the methylperoxy product. Therefore, the mechanism involving the monomer remains a more plausible explanation for the insertion reaction.

## S.2 High energy points with different basis sets

Table S1. Energy difference between the lowest migration transition state and the MECF. Relative free energies in kcal mol<sup>-1</sup>. BS1 corresponds to 6-31+G\* for light atoms and LANL2DZ(f) for Pt, and BS2 corresponds to 6-311++G\*\* for light atoms and LANL2TZ(f) for Pt.

| Complex/TS                   | BS1  | BS2  | $\omega$ B97-xD/BS2 | Inserts O <sub>2</sub> |
|------------------------------|------|------|---------------------|------------------------|
| <b>1/TS</b> <sub>(C-F)</sub> | 0.5  | 1.5  | -0.3                | Yes                    |
| <b>2/TS</b> <sub>(C-F)</sub> | 3.0  | 4.1  | 8.1                 | No                     |
| <b>4/TS</b> <sub>(C-G)</sub> | -1.6 | -0.9 | -3.5                | Yes                    |

Table S1 shows that the energy difference between the lowest energy productive pathway and unproductive one is not an artifact of the method. The trend is kept for all complexes when the basis set is increased, and when the functional is replaced. Thus, the results are robust within the dispersion-corrected DFT framework.

## S.3 Coordination of oxygen

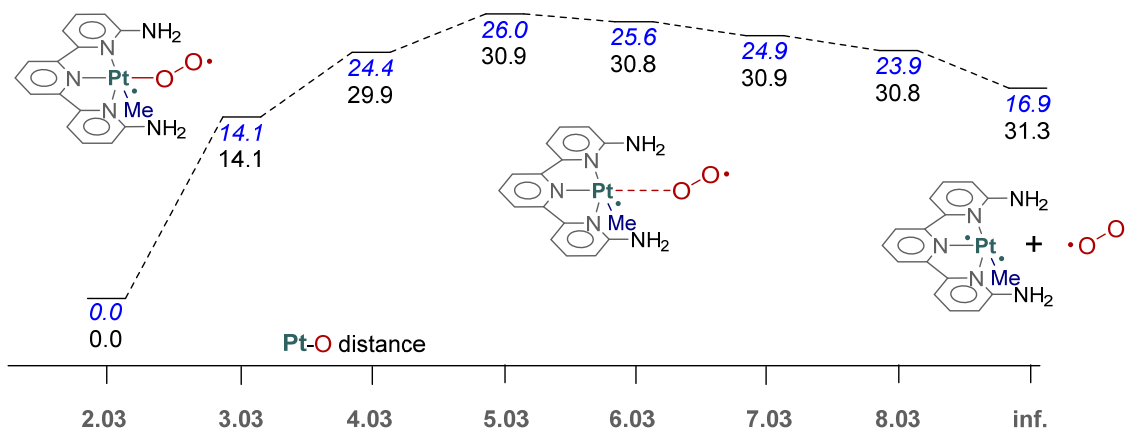

Figure S2. Gibbs free energies (blue) and potential energies (black) for the coordination of dioxygen to the excited triplet complex. All energies in kcal/mol, and distances in Å.

Coordination of dioxygen shows no barrier in the potential energy surface, evidencing the lack of a transition state. But the Gibbs energies show a maximum around 5 Å which indicates the entropic penalty of bringing both fragments together.

#### S.4 Synthesis of palladium complexes analogous to 4

Synthesis of palladium complexes analogous to complex 4.

Reaction with [PdClMe(cod)]:

In acetone:

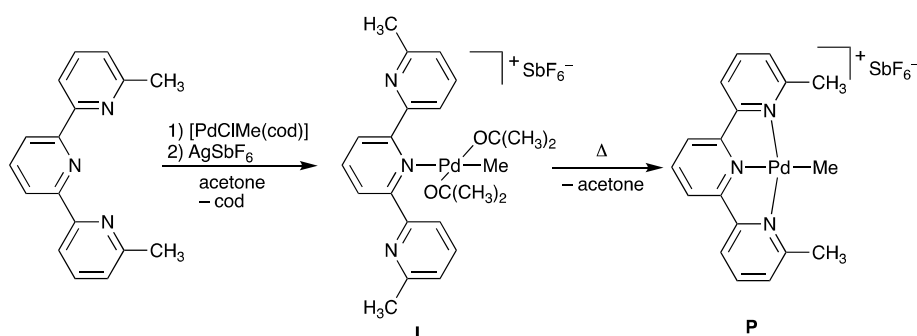

Chloro(1,5-cyclooctadiene)methylpalladium(II) (37.53 mg, 0.14 mmol) and AgSbF<sub>6</sub> (48.65g, 0.14 mmol) were dissolved in dry acetone (10 mL) and stirred for 20 minutes in the dark. A white precipitate was formed. The white solid was filtered and the remaining solution was transferred to a solution of 6,6''-dimethylterpyridine (37.00 mg, 0.14 mmol) in dry acetone (5 mL). The mixture was stirred for another 15 minutes. The solvent was removed under vacuum. The yellow solid was washed with dry dichloromethane (2 x 10 mL) and dried under vacuum. The <sup>1</sup>H NMR spectrum of the initial product in d<sub>6</sub>-acetone at room temperature showed a mixture of the intermediate [PdMe(dimethylterpy)(acetone)<sub>2</sub>]<sup>+</sup> (I) and the product [PdMe(dimethylterpy)]<sup>+</sup> (P), which upon heating is slowly converted over several days to the final product P, as shown in the series of <sup>1</sup>H NMR spectra shown below.

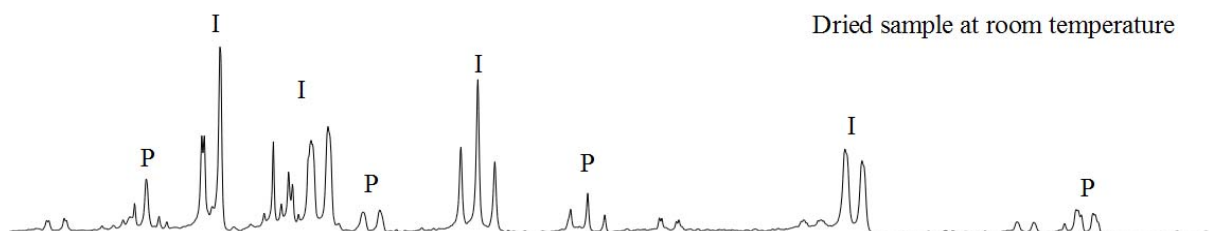

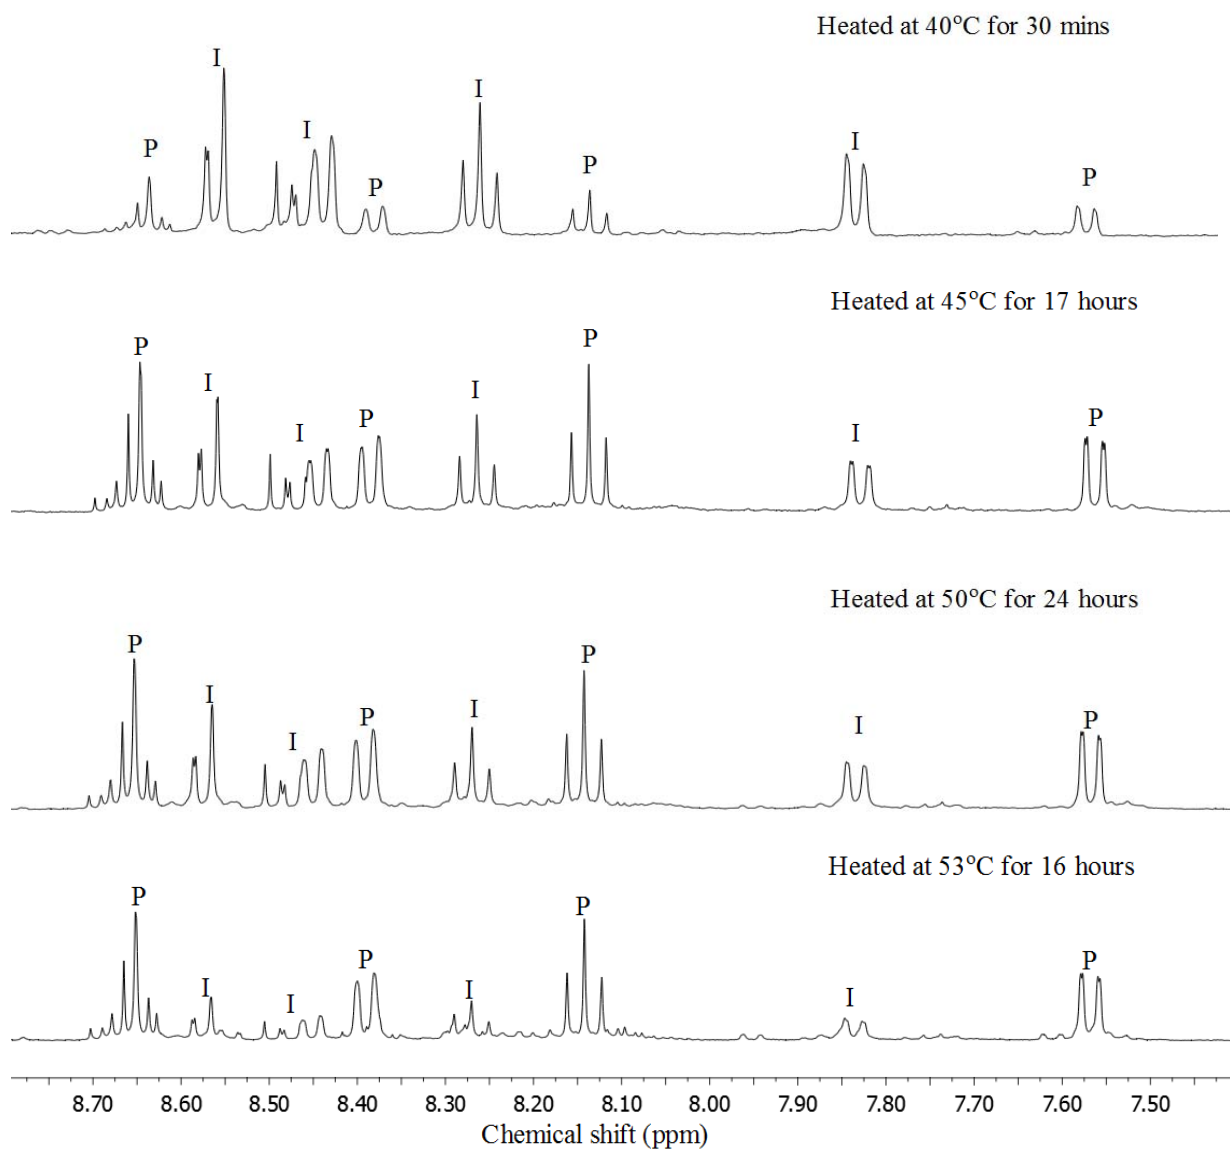

Figure S3.  $^1\text{H}$  NMR spectra showing the conversion of intermediate complex  $[\text{PdMe}(\text{dimethylterpy})(\text{acetone})_2]^+$  (I) to the product complex  $[\text{PdMe}(\text{dimethylterpy})]^+$  (P) upon heating over time in  $\text{d}_6$ -acetone at 298K.

In acetonitrile:

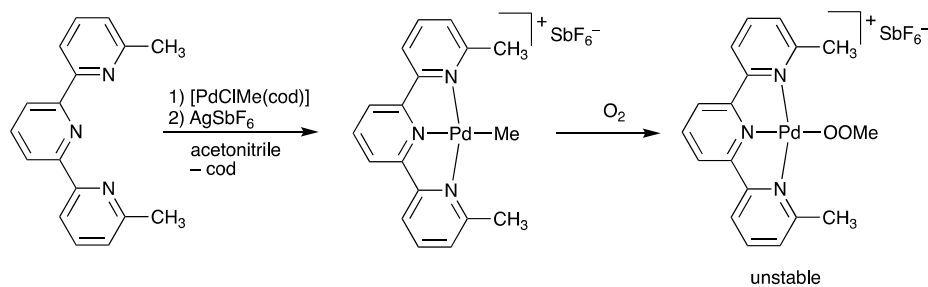

Chloro(1,5-cyclooctadiene)methylpalladium(II) (37.5 mg, 0.14 mmol) and  $\text{AgSbF}_6$  (48.65 g, 0.14 mmol) were dissolved in dry acetonitrile (10 mL) and stirred for 20 minutes in the dark. A white precipitate was formed. The white solid was filtered and the remaining solution was transferred to a solution of 6,6''-dimethylterpyridine (37.00 mg, 0.14 mmol) in dry acetonitrile (10 mL). The mixture was stirred for another 15 minutes. The solvent was removed under vacuum. The yellow complex  $[\text{PdMe}(6,6''\text{-dimethylterpyridine})]\text{SbF}_6$  was washed with dry dichloromethane (2 x 10 mL) and dried under vacuum (38.7 mg, 0.10 mmol, 72%).  $^1\text{H}$  NMR (400 MHz,  $\text{CD}_3\text{CN}$ , 298K)  $\delta$  8.42 (t,  $^3J_{\text{HH}} = 7.9$  Hz, 1H,  $\text{H}^1$ ), 8.27 (d,  $^3J_{\text{HH}} = 7.9$  Hz, 2H,  $\text{H}^2$ ), 8.01 (d,  $^3J_{\text{HH}} = 7.8$  Hz, 2H,  $\text{H}^3$ ), 7.91 (dd,  $^3J_{\text{HH}} = 7.8, 7.6$  Hz, 2H,  $\text{H}^4$ ), 7.32 (d,  $^3J_{\text{HH}} = 7.6$  Hz, 2H,  $\text{H}^5$ ), 2.13 (s, 6H), 0.14 (s, 3H,  $\text{H}^7$ ).  $^{13}\text{C}$  NMR (100 MHz,  $\text{CD}_3\text{CN}$ , 298K)  $\delta$  162.93 (C), 156.95 (C), 156.75 (C), 142.05 (CH), 141.09 (CH), 128.73 (CH), 128.22 (CH), 124.98 (CH), 27.49 (CH<sub>3</sub>), -3.27 (Pd-CH<sub>3</sub>). HRMS (ESI+, TOF)  $m/z$   $[\text{M}+\text{H}]^+$  382.0547, calcd:  $[\text{C}_{18}\text{H}_{18}\text{N}_3\text{Pd}]^+$  382.0535. Elem. Anal. Calcd for  $\text{C}_{18}\text{H}_{18}\text{N}_3\text{PdSbF}_6$ : C, 34.95; H, 2.933; N, 6.794. Found: C, 34.05; H, 3.05; N, 6.72.

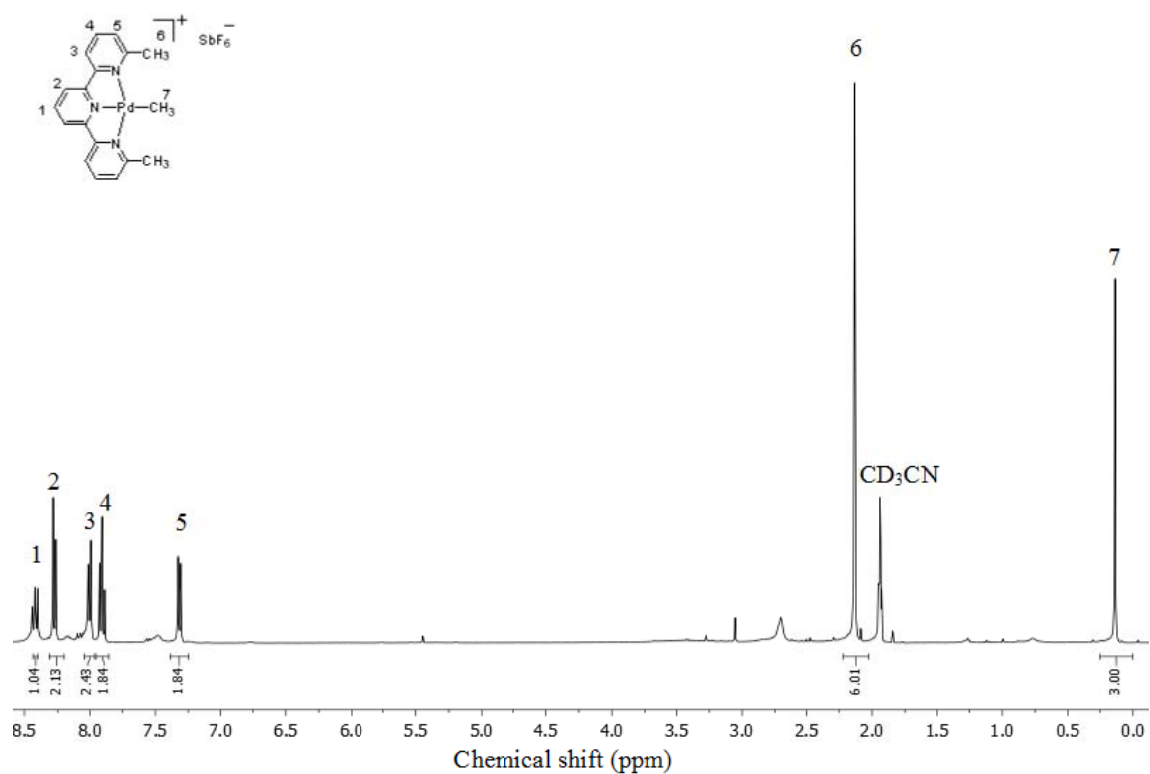

Figure S4.  $^1\text{H}$  NMR spectrum of  $[\text{PdMe}(6,6''\text{-dimethylterpyridine})]\text{SbF}_6$  in  $\text{CD}_3\text{CN}$  at 298K.

### S.5 UV-VIS Experimental Spectra for all Complexes

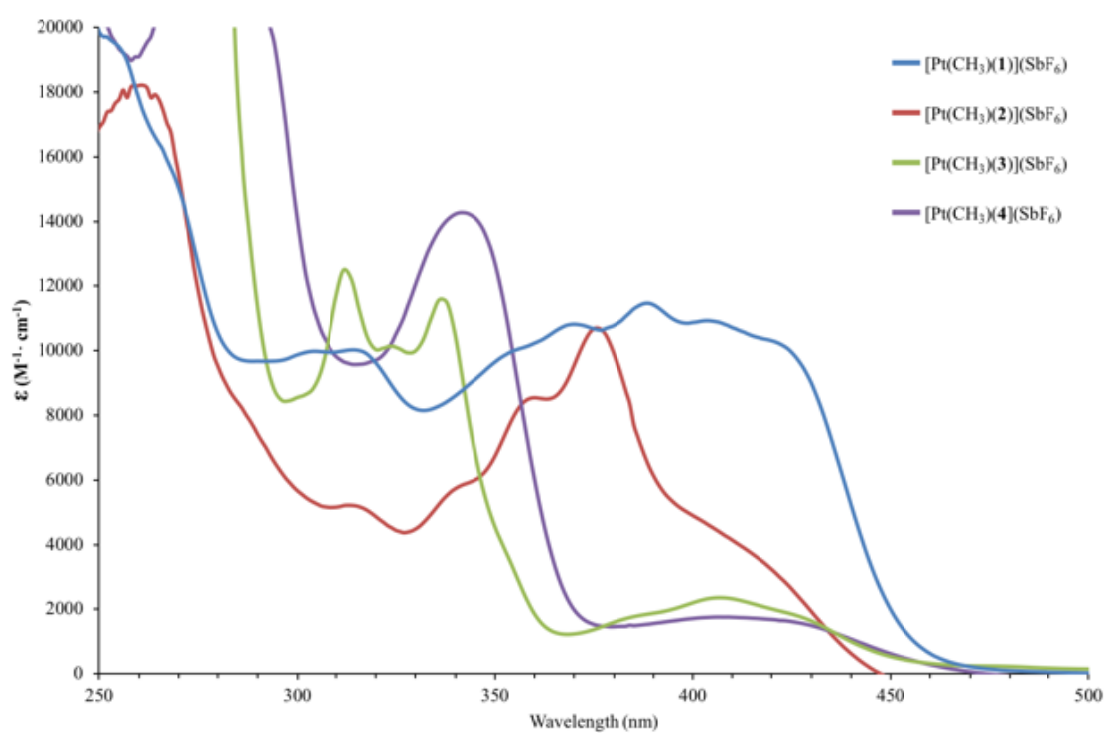

Figure S5. Absorption spectra for complexes 1-4 measured in acetonitrile at room temperature.

## S.6 Computed Excitations for all Complexes

### Complex 1

Excited State 1: Energy = 404 nm,  $f = 0.1343$

HOMO-3 – LUMO 0.32

HOMO – LUMO 0.62

Excited State 2: Energy = 402 nm,  $f = 0.0039$

HOMO-2 – LUMO 0.44

HOMO-1 – LUMO 0.54

Excited State 3: Energy = 384 nm,  $f = 0.0066$

HOMO-2 – LUMO 0.52

HOMO-1 – LUMO 0.42

Excited State 4: Energy = 384 nm,  $f = 0.0066$

HOMO-2 – LUMO 0.52

HOMO-1 – LUMO 0.42

Excited State 5: Energy = 364 nm,  $f = 0.2789$

HOMO-3 – LUMO 0.59

HOMO – LUMO 0.30

Excited State 6: Energy = 363 nm,  $f = 0.0034$

HOMO-3 – LUMO+1 0.59

HOMO – LUMO+1 0.30

Excited State 7: Energy = 351 nm,  $f = 0.0262$

HOMO-2 – LUMO+1 0.70

Excited State 8: Energy = 337 nm,  $f = 0.0048$

HOMO-4 – LUMO+2 0.15

### Complex 2

Excited State 1: Energy = 416 nm,  $f = 0.0080$

HOMO-1 – LUMO 0.59

HOMO – LUMO 0.59

Excited State 2: Energy = 401 nm,  $f = 0.0372$

HOMO-3 – LUMO 0.40

HOMO-1 – LUMO 0.44

Excited State 3: Energy = 379 nm,  $f = 0.0104$

HOMO-2 – LUMO 0.58

HOMO – LUMO 0.24

Excited State 4: Energy = 366 nm,  $f = 0.0481$

HOMO-1 – LUMO+1 0.39

HOMO-1 – LUMO+1 0.56



*Excited State 5: Energy = 358 nm, f = 0.2245*  
*HOMO-3 – LUMO 0.48*  
*HOMO – LUMO 0.24*

*Excited State 6: Energy = 354 nm, f = 0.0343*  
*HOMO-1 – LUMO+1 0.50*  
*HOMO – LUMO+1 0.34*

*Excited State 7: Energy = 350 nm, f = 0.0100*  
*HOMO-4 – LUMO 0.67*  
*HOMO-1 – LUMO+1 0.13*

*Excited State 8: Energy = 338 nm, f = 0.0312*  
*HOMO-2 – LUMO 0.17*  
*HOMO-2 – LUMO+1 0.62*

#### *Complex 3*

*Excited State 1: Energy = 432 nm, f = 0.0032*  
*HOMO – LUMO 0.70*

*Excited State 2: Energy = 400 nm, f = 0.0102*  
*HOMO-3 – LUMO 0.63*  
*HOMO-1 – LUMO 0.31*

*Excited State 3: Energy = 389 nm, f = 0.0175*  
*HOMO-2 – LUMO 0.31*  
*HOMO-1 – LUMO 0.60*

*Excited State 4: Energy = 373 nm, f = 0.0000*  
*HOMO-3 – LUMO 0.26*  
*HOMO – LUMO+1 0.65*

*Excited State 5: Energy = 364 nm, f = 0.0000*  
*HOMO-3 – LUMO 0.65*  
*HOMO – LUMO+1 0.26*

*Excited State 6: Energy = 359 nm, f = 0.0227*  
*HOMO-1 – LUMO+1 0.69*

*Excited State 7: Energy = 332 nm, f = 0.0725*  
*HOMO-2 – LUMO+1 0.65*  
*HOMO-1 – LUMO 0.16*

*Excited State 8: Energy = 320 nm, f = 0.0000*  
*HOMO-5 – LUMO 0.41*  
*HOMO-3 – LUMO+1 0.57*

#### *Complex 4*

*Excited State 1: Energy = 500 nm, f = 0.0000*  
*HOMO-1 – LUMO+1 0.27*  
*HOMO – LUMO 0.59*

*Excited State 2: Energy = 449 nm, f = 0.0000*  
*HOMO-3 – LUMO 0.23*  
*HOMO-2 – LUMO 0.61*

*Excited State 3: Energy = 439 nm, f = 0.0000*  
*HOMO-3 – LUMO+1 0.35*  
*HOMO – LUMO 0.36*

*Excited State 4: Energy = 428 nm, f = 0.0087*  
*HOMO-1 – LUMO 0.32*  
*HOMO – LUMO 0.62*

*Excited State 5: Energy = 427 nm, f = 0.0000*  
*HOMO-3 – LUMO+1 0.20*  
*HOMO-1 – LUMO 0.62*

*Excited State 6: Energy = 408 nm, f = 0.0000*  
*HOMO-3 – LUMO 0.38*  
*HOMO – LUMO+1 0.50*

*Excited State 7: Energy = 403 nm, f = 0.075*  
*HOMO-2 – LUMO 0.70*

*Excited State 8: Energy = 400 nm, f = 0.0122*  
*HOMO-2 – LUMO 0.62*  
*HOMO-1 – LUMO+1 0.30*

*Excited State 9: Energy = 393 nm, f = 0.0000*  
*HOMO – LUMO+2 0.28*  
*HOMO – LUMO+4 0.56*

*Excited State 10: Energy = 385 nm, f = 0.0236*  
*HOMO – LUMO+1 0.70*

*Excited State 11: Energy = 382 nm, f = 0.0000*  
*HOMO-3 – LUMO 0.43*  
*HOMO – LUMO+1 0.48*

*Excited State 12: Energy = 378 nm, f = 0.0000*  
*HOMO-1 – LUMO+2 0.28*  
*HOMO-1 – LUMO+4 0.57*

*Excited State 13: Energy = 369 nm, f = 0.0000*  
*HOMO-2 – LUMO+4 0.50*  
*HOMO-1 – LUMO+1 0.26*

*Excited State 14: Energy = 363 nm, f = 0.0000*

HOMO-4 – LUMO 0.30  
HOMO-1 – LUMO+1 0.56

Excited State 15: Energy = 359 nm,  $f = 0.0048$   
HOMO-3 – LUMO 0.14  
HOMO-1 – LUMO+1 0.68

Excited State 16: Energy = 356 nm,  $f = 0.0000$   
HOMO-3 – LUMO+1 0.37  
HOMO-2 – LUMO+1 0.53

Excited State 17: Energy = 355 nm,  $f = 0.0000$   
HOMO-4 – LUMO 0.62  
HOMO-1 – LUMO+1 0.30

Excited State 18: Energy = 353 nm,  $f = 0.0105$   
HOMO-4 – LUMO 0.53  
HOMO-3 – LUMO 0.26

Excited State 19: Energy = 363 nm,  $f = 0.0003$   
HOMO-2 – LUMO+1 0.39  
HOMO-1 – LUMO+4 0.45

Excited State 20: Energy = 344 nm,  $f = 0.0506$   
HOMO-3 – LUMO+1 0.50  
HOMO – LUMO+4 0.35

Excited State 21: Energy = 334 nm,  $f = 0.0029$   
HOMO-2 – LUMO+2 0.29  
HOMO-2 – LUMO+4 0.55

### S.7 Cartesian Coordinates Of Intermediates and Transition States

Complex 1 a

E = -1011.536139

Number of negative frequencies = 0

|    |           |           |           |
|----|-----------|-----------|-----------|
| N  | -1.491187 | -1.927513 | 0.044681  |
| C  | -0.627875 | -2.967015 | 0.059675  |
| C  | -2.833958 | -2.188658 | 0.239653  |
| C  | -1.092606 | -4.302830 | 0.132409  |
| C  | -3.325376 | -3.470614 | 0.344380  |
| C  | -2.433423 | -4.549197 | 0.264469  |
| H  | -0.364645 | -5.109774 | 0.093590  |
| H  | -4.386225 | -3.642227 | 0.498961  |
| H  | -2.801638 | -5.570313 | 0.329116  |
| N  | -3.066269 | 0.158160  | 0.338599  |
| C  | -3.715408 | -1.015024 | 0.356276  |
| C  | -3.683940 | 1.348442  | 0.346474  |
| C  | -5.103923 | -1.024901 | 0.467100  |
| C  | -5.071667 | 1.395887  | 0.457137  |
| C  | -5.771872 | 0.194942  | 0.529969  |
| H  | -5.663815 | -1.955678 | 0.489692  |
| H  | -5.606238 | 2.341628  | 0.472374  |
| H  | -6.855495 | 0.210095  | 0.616620  |
| N  | -1.435607 | 2.199060  | 0.031524  |
| C  | -0.544726 | 3.215055  | 0.040397  |
| C  | -2.771458 | 2.496998  | 0.220305  |
| C  | -0.974020 | 4.563492  | 0.095982  |
| C  | -3.228922 | 3.792591  | 0.310021  |
| C  | -2.308505 | 4.846258  | 0.220004  |
| H  | -0.224729 | 5.350421  | 0.049596  |
| H  | -4.285151 | 3.993821  | 0.460296  |
| H  | -2.649339 | 5.877624  | 0.270450  |
| C  | 0.766984  | 0.103764  | -1.086241 |
| H  | 0.857145  | 0.985499  | -1.737295 |
| H  | 1.657971  | 0.094244  | -0.432113 |
| H  | 0.834590  | -0.783878 | -1.732111 |
| Pt | -1.093612 | 0.130135  | -0.149013 |
| N  | 0.773398  | 2.938127  | -0.025127 |
| H  | 1.436598  | 3.680222  | 0.154299  |
| H  | 1.085045  | 1.990471  | 0.149590  |
| N  | 0.697175  | -2.728098 | -0.015877 |
| H  | 1.037443  | -1.788578 | 0.148617  |
| H  | 1.339083  | -3.487662 | 0.168321  |

Dioxygen

E = -150.251917

Number of negative frequencies = 0

|   |           |          |          |
|---|-----------|----------|----------|
| O | 0.896263  | 1.251748 | 0.000000 |
| O | -0.309611 | 1.251748 | 0.000000 |

Complex 1 <sup>3</sup>a

Number of negative frequencies = 0

E = -1011.464600

|    |           |           |           |
|----|-----------|-----------|-----------|
| N  | -1.545966 | -2.068375 | -0.470338 |
| C  | -0.736613 | -3.129659 | -0.618629 |
| C  | -2.770538 | -2.231010 | 0.099882  |
| C  | -1.137585 | -4.417986 | -0.209173 |
| C  | -3.215252 | -3.468161 | 0.537065  |
| C  | -2.376807 | -4.575422 | 0.371200  |
| H  | -0.465729 | -5.260545 | -0.358332 |
| H  | -4.182293 | -3.579344 | 1.018857  |
| H  | -2.701189 | -5.557899 | 0.707387  |
| N  | -2.940626 | 0.158756  | 0.124621  |
| C  | -3.589845 | -1.013338 | 0.252205  |
| C  | -3.557003 | 1.348698  | 0.248397  |
| C  | -4.958129 | -1.019003 | 0.516415  |
| C  | -4.925063 | 1.391705  | 0.511568  |
| C  | -5.623127 | 0.195969  | 0.640175  |
| H  | -5.504931 | -1.954579 | 0.597564  |
| H  | -5.446821 | 2.341519  | 0.590890  |
| H  | -6.694304 | 0.211244  | 0.826197  |
| N  | -1.471799 | 2.347440  | -0.445992 |
| C  | -0.632080 | 3.387097  | -0.577889 |
| C  | -2.703834 | 2.544108  | 0.098478  |
| C  | -1.012859 | 4.688836  | -0.191592 |
| C  | -3.128010 | 3.795410  | 0.515215  |
| C  | -2.261381 | 4.881580  | 0.356621  |
| H  | -0.316797 | 5.513381  | -0.330294 |
| H  | -4.101734 | 3.933711  | 0.975900  |
| H  | -2.570182 | 5.874926  | 0.675032  |
| C  | 0.619551  | 0.070808  | 0.883986  |
| H  | 1.583191  | 0.055856  | 0.349455  |
| H  | 0.560587  | 0.965088  | 1.516414  |
| H  | 0.517611  | -0.838625 | 1.488725  |
| Pt | -0.920336 | 0.129010  | -0.569230 |
| N  | 0.586140  | 3.162261  | -1.148854 |
| H  | 1.297810  | 3.870869  | -1.018888 |
| H  | 0.935721  | 2.209482  | -1.141651 |
| N  | 0.466954  | -2.935192 | -1.229062 |
| H  | 0.822037  | -1.984704 | -1.260754 |
| H  | 1.175037  | -3.648934 | -1.108771 |

Complex 1 c

E = -1161.78191466

Number of negative frequencies = 0

|   |           |           |          |
|---|-----------|-----------|----------|
| N | -1.477591 | -1.887543 | 0.136851 |
| C | -0.575020 | -2.896332 | 0.103117 |
| C | -2.828881 | -2.164749 | 0.236839 |
| C | -1.025951 | -4.240654 | 0.192594 |
| C | -3.291999 | -3.454709 | 0.320457 |
| C | -2.362596 | -4.509839 | 0.300770 |
| H | -0.283673 | -5.035052 | 0.171134 |
| H | -4.355389 | -3.655466 | 0.407553 |
| H | -2.708528 | -5.538182 | 0.371173 |

|    |           |           |           |
|----|-----------|-----------|-----------|
| N  | -3.088931 | 0.183874  | 0.240588  |
| C  | -3.725449 | -0.999949 | 0.227916  |
| C  | -3.694349 | 1.377682  | 0.131051  |
| C  | -5.115334 | -1.007221 | 0.163123  |
| C  | -5.083758 | 1.415671  | 0.058406  |
| C  | -5.783523 | 0.212559  | 0.088539  |
| H  | -5.673458 | -1.938923 | 0.153207  |
| H  | -5.615427 | 2.359136  | -0.026465 |
| H  | -6.868968 | 0.224289  | 0.033453  |
| N  | -1.425356 | 2.207706  | 0.216403  |
| C  | -0.518048 | 3.201256  | 0.371395  |
| C  | -2.768332 | 2.518071  | 0.104442  |
| C  | -0.928113 | 4.553481  | 0.217086  |
| C  | -3.202539 | 3.816727  | 0.005502  |
| C  | -2.249553 | 4.850769  | 0.027025  |
| H  | -0.172153 | 5.332580  | 0.283688  |
| H  | -4.261426 | 4.040566  | -0.079631 |
| H  | -2.568014 | 5.885299  | -0.075275 |
| C  | -1.335961 | 0.136690  | -1.932185 |
| H  | -1.685496 | 1.126218  | -2.242942 |
| H  | -0.335974 | -0.074596 | -2.326487 |
| H  | -2.047415 | -0.644748 | -2.216801 |
| Pt | -1.098701 | 0.146727  | 0.133611  |
| O  | 0.657699  | 0.216007  | 1.639547  |
| O  | 0.878718  | 0.099227  | 0.239030  |
| N  | 0.723409  | -2.609173 | -0.039820 |
| H  | 1.043999  | -1.631204 | 0.049633  |
| H  | 1.397828  | -3.359246 | 0.033363  |
| N  | 0.751519  | 2.891152  | 0.662044  |
| H  | 0.951394  | 1.967485  | 1.071650  |
| H  | 1.381959  | 3.650668  | 0.884828  |

Complex 1 e

E = -1161.774290

Number of negative frequencies = 0

|   |           |           |          |
|---|-----------|-----------|----------|
| N | -1.488852 | -1.887913 | 0.204179 |
| C | -0.595882 | -2.913122 | 0.220976 |
| C | -2.846794 | -2.161179 | 0.151277 |
| C | -1.076978 | -4.256146 | 0.191855 |
| C | -3.329633 | -3.444755 | 0.124625 |
| C | -2.415741 | -4.515307 | 0.147204 |
| H | -0.343947 | -5.059651 | 0.199826 |
| H | -4.398542 | -3.630887 | 0.092282 |
| H | -2.776790 | -5.540684 | 0.124247 |
| N | -3.132997 | 0.184576  | 0.192923 |
| C | -3.754003 | -1.001542 | 0.148929 |
| C | -3.745684 | 1.378386  | 0.210263 |
| C | -5.146783 | -1.018630 | 0.123538 |
| C | -5.136333 | 1.409141  | 0.191696 |
| C | -5.823832 | 0.197560  | 0.149483 |
| H | -5.700758 | -1.952331 | 0.091623 |
| H | -5.681847 | 2.348298  | 0.210825 |

|    |           |           |           |
|----|-----------|-----------|-----------|
| H  | -6.910756 | 0.202428  | 0.136692  |
| N  | -1.478041 | 2.237944  | 0.257407  |
| C  | -0.564228 | 3.235681  | 0.187267  |
| C  | -2.828734 | 2.530748  | 0.227561  |
| C  | -1.002450 | 4.587284  | 0.138788  |
| C  | -3.280659 | 3.826290  | 0.185236  |
| C  | -2.339740 | 4.872090  | 0.148275  |
| H  | -0.251043 | 5.372048  | 0.091208  |
| H  | -4.344937 | 4.039649  | 0.167461  |
| H  | -2.678288 | 5.904834  | 0.116290  |
| C  | -0.945773 | 0.225570  | -1.753052 |
| H  | -1.312646 | 1.194024  | -2.106865 |
| H  | 0.137189  | 0.081923  | -1.871845 |
| H  | -1.543215 | -0.600972 | -2.150588 |
| Pt | -1.116446 | 0.179657  | 0.292815  |
| O  | 1.672089  | -0.319576 | -0.394291 |
| O  | 0.859055  | 0.256902  | 0.595349  |
| N  | 0.713070  | -2.670957 | 0.292105  |
| H  | 1.158267  | -1.742782 | -0.000622 |
| H  | 1.312353  | -3.485924 | 0.235705  |
| N  | 0.735590  | 2.927700  | 0.147485  |
| H  | 1.038507  | 1.949618  | 0.296487  |
| H  | 1.417350  | 3.674322  | 0.157115  |

Complex 1 TS<sub>1</sub>

E = -1161.741991

Number of negative frequencies = 1

|   |           |           |           |
|---|-----------|-----------|-----------|
| N | -1.705954 | -1.918540 | 0.406641  |
| C | -0.843030 | -2.960866 | 0.489616  |
| C | -3.046437 | -2.181506 | 0.196175  |
| C | -1.310002 | -4.294074 | 0.350255  |
| C | -3.531633 | -3.460036 | 0.057033  |
| C | -2.637301 | -4.538454 | 0.133520  |
| H | -0.584972 | -5.101549 | 0.419622  |
| H | -4.589580 | -3.634326 | -0.110711 |
| H | -2.999562 | -5.557753 | 0.024840  |
| N | -3.296372 | 0.173326  | 0.217411  |
| C | -3.930546 | -1.013510 | 0.139976  |
| C | -3.935549 | 1.357287  | 0.216930  |
| C | -5.317439 | -1.036416 | 0.043338  |
| C | -5.324835 | 1.377607  | 0.130806  |
| C | -6.008756 | 0.170795  | 0.042391  |
| H | -5.858165 | -1.976323 | -0.014118 |
| H | -5.872250 | 2.315292  | 0.138459  |
| H | -7.093753 | 0.169935  | -0.021230 |
| N | -1.699640 | 2.253496  | 0.413520  |
| C | -0.830819 | 3.294747  | 0.366377  |
| C | -3.048880 | 2.521433  | 0.285402  |
| C | -1.309604 | 4.628743  | 0.261315  |
| C | -3.545808 | 3.799184  | 0.172506  |
| C | -2.650243 | 4.878455  | 0.171380  |
| H | -0.580146 | 5.435596  | 0.255658  |

|    |           |           |           |
|----|-----------|-----------|-----------|
| H  | -4.612590 | 3.969906  | 0.070061  |
| H  | -3.019818 | 5.897991  | 0.092539  |
| C  | 0.448504  | 0.224787  | -1.136257 |
| H  | 1.331058  | 0.824172  | -0.936071 |
| H  | 0.633261  | -0.828997 | -1.335126 |
| H  | -0.291445 | 0.702587  | -1.782389 |
| Pt | -1.338491 | 0.146271  | 0.513400  |
| O  | 1.231207  | 0.900886  | 1.709590  |
| O  | 0.629172  | -0.076261 | 0.983901  |
| N  | 0.492951  | 3.065115  | 0.371928  |
| H  | 0.862001  | 2.224812  | 0.879404  |
| H  | 1.076555  | 3.890128  | 0.446743  |
| N  | 0.468725  | -2.743009 | 0.674538  |
| H  | 0.813760  | -1.819766 | 0.944573  |
| H  | 1.067193  | -3.539430 | 0.849762  |

Complex 1 TS<sub>3</sub>

E = -1161.774290

Number of negative frequencies = 1

|    |           |           |           |
|----|-----------|-----------|-----------|
| N  | -1.488852 | -1.887913 | 0.204179  |
| C  | -0.595882 | -2.913122 | 0.220976  |
| C  | -2.846794 | -2.161179 | 0.151277  |
| C  | -1.076978 | -4.256146 | 0.191855  |
| C  | -3.329633 | -3.444755 | 0.124625  |
| C  | -2.415741 | -4.515307 | 0.147204  |
| H  | -0.343947 | -5.059651 | 0.199826  |
| H  | -4.398542 | -3.630887 | 0.092282  |
| H  | -2.776790 | -5.540684 | 0.124247  |
| N  | -3.132997 | 0.184576  | 0.192923  |
| C  | -3.754003 | -1.001542 | 0.148929  |
| C  | -3.745684 | 1.378386  | 0.210263  |
| C  | -5.146783 | -1.018630 | 0.123538  |
| C  | -5.136333 | 1.409141  | 0.191696  |
| C  | -5.823832 | 0.197560  | 0.149483  |
| H  | -5.700758 | -1.952331 | 0.091623  |
| H  | -5.681847 | 2.348298  | 0.210825  |
| H  | -6.910756 | 0.202428  | 0.136692  |
| N  | -1.478041 | 2.237944  | 0.257407  |
| C  | -0.564228 | 3.235681  | 0.187267  |
| C  | -2.828734 | 2.530748  | 0.227561  |
| C  | -1.002450 | 4.587284  | 0.138788  |
| C  | -3.280659 | 3.826290  | 0.185236  |
| C  | -2.339740 | 4.872090  | 0.148275  |
| H  | -0.251043 | 5.372048  | 0.091208  |
| H  | -4.344937 | 4.039649  | 0.167461  |
| H  | -2.678288 | 5.904834  | 0.116290  |
| C  | -0.945773 | 0.225570  | -1.753052 |
| H  | -1.312646 | 1.194024  | -2.106865 |
| H  | 0.137189  | 0.081923  | -1.871845 |
| H  | -1.543215 | -0.600972 | -2.150588 |
| Pt | -1.116446 | 0.179657  | 0.292815  |
| O  | 1.672089  | -0.319576 | -0.394291 |



|   |          |           |           |
|---|----------|-----------|-----------|
| O | 0.859055 | 0.256902  | 0.595349  |
| N | 0.713070 | -2.670957 | 0.292105  |
| H | 1.158267 | -1.742782 | -0.000622 |
| H | 1.312353 | -3.485924 | 0.235705  |
| N | 0.735590 | 2.927700  | 0.147485  |
| H | 1.038507 | 1.949618  | 0.296487  |
| H | 1.417350 | 3.674322  | 0.157115  |

Complex 1 f

scf done: -1161.824387

Number of negative frequencies = 0

|    |           |           |           |
|----|-----------|-----------|-----------|
| N  | -1.875130 | -1.930435 | 0.269194  |
| C  | -1.011434 | -2.972660 | 0.287301  |
| C  | -3.228601 | -2.192691 | 0.312886  |
| C  | -1.494175 | -4.307826 | 0.311304  |
| C  | -3.735088 | -3.469987 | 0.345853  |
| C  | -2.839358 | -4.550981 | 0.337821  |
| H  | -0.768632 | -5.117821 | 0.311089  |
| H  | -4.806231 | -3.640919 | 0.382175  |
| H  | -3.213565 | -5.571542 | 0.358958  |
| N  | -3.442313 | 0.165410  | 0.329144  |
| C  | -4.098508 | -1.013527 | 0.332353  |
| C  | -4.064945 | 1.361328  | 0.322101  |
| C  | -5.488509 | -1.013969 | 0.352984  |
| C  | -5.455115 | 1.400479  | 0.342441  |
| C  | -6.160928 | 0.203308  | 0.362425  |
| H  | -6.044130 | -1.946845 | 0.359685  |
| H  | -5.983844 | 2.348934  | 0.343285  |
| H  | -7.247457 | 0.218728  | 0.381401  |
| N  | -1.813200 | 2.207285  | 0.312019  |
| C  | -0.915581 | 3.223099  | 0.359812  |
| C  | -3.158982 | 2.511600  | 0.296854  |
| C  | -1.364468 | 4.572519  | 0.298358  |
| C  | -3.628533 | 3.802196  | 0.264695  |
| C  | -2.699889 | 4.856397  | 0.248476  |
| H  | -0.616614 | 5.362268  | 0.312543  |
| H  | -4.694700 | 4.004891  | 0.251592  |
| H  | -3.042749 | 5.887647  | 0.213077  |
| C  | 1.191911  | 0.271515  | -1.204750 |
| H  | 1.135766  | 1.345588  | -1.415615 |
| H  | 2.234831  | -0.060900 | -1.163552 |
| H  | 0.630083  | -0.302015 | -1.952593 |
| Pt | -1.500661 | 0.133373  | 0.247081  |
| O  | 1.355637  | 0.548314  | 1.141299  |
| O  | 0.593024  | -0.026237 | 0.059433  |
| N  | 0.311357  | -2.750412 | 0.269965  |
| H  | 0.683286  | -1.804601 | 0.339911  |
| H  | 0.944447  | -3.532527 | 0.365479  |
| N  | 0.393618  | 2.960449  | 0.442757  |
| H  | 0.774382  | 2.044155  | 0.792365  |
| H  | 1.009742  | 3.758856  | 0.532316  |

Complex 1 TS<sub>4</sub>

E = -1161.813915

Number of negative frequencies = 1

|    |           |           |           |
|----|-----------|-----------|-----------|
| N  | -1.711847 | -1.957075 | 0.415359  |
| C  | -0.829544 | -2.971135 | 0.583409  |
| C  | -3.063564 | -2.226305 | 0.400852  |
| C  | -1.299147 | -4.313263 | 0.592218  |
| C  | -3.555718 | -3.508876 | 0.437791  |
| C  | -2.640376 | -4.573132 | 0.511043  |
| H  | -0.570193 | -5.114997 | 0.686941  |
| H  | -4.625265 | -3.695163 | 0.423344  |
| H  | -2.999646 | -5.599364 | 0.527038  |
| N  | -3.258100 | 0.133409  | 0.404728  |
| C  | -3.927240 | -1.043105 | 0.377939  |
| C  | -3.867657 | 1.340395  | 0.346561  |
| C  | -5.316378 | -1.024032 | 0.336545  |
| C  | -5.255938 | 1.391119  | 0.303723  |
| C  | -5.975726 | 0.200826  | 0.306404  |
| H  | -5.880340 | -1.952220 | 0.319376  |
| H  | -5.770598 | 2.346977  | 0.260528  |
| H  | -7.061615 | 0.227872  | 0.273347  |
| N  | -1.608198 | 2.126546  | 0.367472  |
| C  | -0.669876 | 3.088937  | 0.526393  |
| C  | -2.941331 | 2.473437  | 0.346601  |
| C  | -1.055496 | 4.456168  | 0.519166  |
| C  | -3.355734 | 3.783952  | 0.363178  |
| C  | -2.379544 | 4.792777  | 0.427100  |
| H  | -0.281014 | 5.214521  | 0.608527  |
| H  | -4.412042 | 4.034234  | 0.343014  |
| H  | -2.677686 | 5.838555  | 0.428449  |
| C  | 1.465223  | 0.561898  | -1.582434 |
| H  | 1.306344  | 1.640309  | -1.453593 |
| H  | 2.527246  | 0.316944  | -1.446059 |
| H  | 1.130549  | 0.248080  | -2.577485 |
| Pt | -1.338784 | 0.074397  | 0.282373  |
| O  | 1.190379  | 0.008330  | 0.704663  |
| O  | 0.709543  | -0.200559 | -0.662339 |
| N  | 0.470888  | -2.704668 | 0.748670  |
| H  | 0.837700  | -1.740924 | 0.835529  |
| H  | 1.110115  | -3.476871 | 0.879602  |
| N  | 0.609669  | 2.731894  | 0.688448  |
| H  | 0.896048  | 1.739517  | 0.798070  |
| H  | 1.306754  | 3.454063  | 0.811532  |

Complex 1 g

E = -1161.857978

Number of negative frequencies = 0

|   |           |           |          |
|---|-----------|-----------|----------|
| N | -2.235106 | -1.879437 | 0.223160 |
| C | -1.352633 | -2.891237 | 0.061125 |
| C | -3.564525 | -2.168647 | 0.440404 |
| C | -1.791815 | -4.239954 | 0.135191 |
| C | -4.029187 | -3.460183 | 0.519144 |

|    |           |           |           |
|----|-----------|-----------|-----------|
| C  | -3.113057 | -4.514421 | 0.364641  |
| H  | -1.059697 | -5.033348 | 0.002175  |
| H  | -5.081546 | -3.663031 | 0.693045  |
| H  | -3.455550 | -5.544963 | 0.421508  |
| N  | -3.819244 | 0.181886  | 0.447642  |
| C  | -4.448882 | -1.002867 | 0.571868  |
| C  | -4.442073 | 1.373348  | 0.538699  |
| C  | -5.821155 | -1.017378 | 0.799338  |
| C  | -5.814306 | 1.401968  | 0.765198  |
| C  | -6.496278 | 0.195777  | 0.892856  |
| H  | -6.359616 | -1.954856 | 0.903465  |
| H  | -6.348021 | 2.344757  | 0.842612  |
| H  | -7.568781 | 0.201460  | 1.069770  |
| N  | -2.223434 | 2.225494  | 0.162394  |
| C  | -1.335226 | 3.226722  | -0.032230 |
| C  | -3.550658 | 2.529449  | 0.374387  |
| C  | -1.765217 | 4.579777  | 0.006900  |
| C  | -4.006330 | 3.825840  | 0.418790  |
| C  | -3.083650 | 4.869344  | 0.233283  |
| H  | -1.027891 | 5.364097  | -0.149157 |
| H  | -5.056571 | 4.041132  | 0.590181  |
| H  | -3.418635 | 5.903459  | 0.263672  |
| C  | 2.129681  | 0.181928  | 1.007546  |
| H  | 2.454929  | 1.070718  | 0.445063  |
| H  | 2.568728  | 0.200656  | 2.011274  |
| H  | 2.455304  | -0.726687 | 0.477976  |
| Pt | -1.887483 | 0.172738  | 0.163870  |
| O  | 0.737174  | 0.185725  | 1.206832  |
| O  | 0.152462  | 0.163113  | -0.124460 |
| N  | -0.051395 | 2.918629  | -0.258799 |
| H  | 0.617326  | 3.655700  | -0.433204 |
| H  | 0.237646  | 1.934653  | -0.331399 |
| N  | -0.065433 | -2.597080 | -0.165621 |
| H  | 0.598622  | -3.342364 | -0.322030 |
| H  | 0.228603  | -1.617517 | -0.270256 |

Complex 1 CP1

E = -1161.73962631

Number of negative frequencies = 3

|   |           |           |          |
|---|-----------|-----------|----------|
| N | -1.852010 | -1.942952 | 0.404516 |
| C | -0.994302 | -2.991675 | 0.396900 |
| C | -3.207546 | -2.200235 | 0.366754 |
| C | -1.483540 | -4.325351 | 0.373768 |
| C | -3.718175 | -3.476214 | 0.331844 |
| C | -2.829092 | -4.562660 | 0.339230 |
| H | -0.761427 | -5.139115 | 0.375867 |
| H | -4.790250 | -3.640783 | 0.301029 |
| H | -3.208643 | -5.581444 | 0.317142 |
| N | -3.430372 | 0.157714  | 0.402007 |
| C | -4.081261 | -1.021288 | 0.360952 |
| C | -4.056734 | 1.349640  | 0.392657 |
| C | -5.471218 | -1.027635 | 0.313307 |

|    |           |           |           |
|----|-----------|-----------|-----------|
| C  | -5.446591 | 1.387205  | 0.350653  |
| C  | -6.147463 | 0.187559  | 0.312086  |
| H  | -6.026331 | -1.960207 | 0.277418  |
| H  | -5.981513 | 2.332718  | 0.346284  |
| H  | -7.233449 | 0.199506  | 0.277292  |
| N  | -1.806980 | 2.214864  | 0.448789  |
| C  | -0.925663 | 3.242351  | 0.416888  |
| C  | -3.154385 | 2.505046  | 0.402196  |
| C  | -1.380358 | 4.583805  | 0.327062  |
| C  | -3.635098 | 3.791877  | 0.334348  |
| C  | -2.720620 | 4.854724  | 0.293519  |
| H  | -0.637702 | 5.378593  | 0.300080  |
| H  | -4.703283 | 3.980760  | 0.302103  |
| H  | -3.074309 | 5.881260  | 0.239494  |
| C  | 1.077531  | 0.346800  | -1.745247 |
| H  | 0.541971  | 1.283361  | -1.865363 |
| H  | 2.137816  | 0.360503  | -1.515258 |
| H  | 0.608245  | -0.579958 | -2.062276 |
| Pt | -1.467730 | 0.125379  | 0.471165  |
| O  | 1.217094  | 0.595396  | 1.497563  |
| O  | 0.573408  | -0.079177 | 0.557098  |
| N  | 0.396980  | 2.992043  | 0.435432  |
| H  | 1.002533  | 3.796703  | 0.541165  |
| H  | 0.743616  | 2.129637  | 0.879037  |
| N  | 0.331008  | -2.782900 | 0.387994  |
| H  | 0.722092  | -1.845375 | 0.487364  |
| H  | 0.950512  | -3.575906 | 0.479444  |

Complex 1 TS<sub>5</sub>

E = -1161.749414

Number of negative frequencies = 1

|   |           |           |           |
|---|-----------|-----------|-----------|
| N | 0.371805  | -2.107823 | -0.616427 |
| C | 0.464087  | -3.219224 | 0.145345  |
| C | -0.275298 | -2.189142 | -1.837848 |
| C | 0.021796  | -4.474324 | -0.344772 |
| C | -0.735460 | -3.384310 | -2.337737 |
| C | -0.562883 | -4.552807 | -1.579101 |
| H | 0.145616  | -5.351987 | 0.285044  |
| H | -1.243674 | -3.420486 | -3.296477 |
| H | -0.914531 | -5.508380 | -1.960842 |
| N | -0.123190 | 0.166402  | -1.865161 |
| C | -0.471241 | -0.921743 | -2.563767 |
| C | -0.121689 | 1.411229  | -2.360904 |
| C | -0.949947 | -0.767180 | -3.862792 |
| C | -0.590906 | 1.622750  | -3.655108 |
| C | -1.016683 | 0.519740  | -4.391358 |
| H | -1.245937 | -1.622805 | -4.463214 |
| H | -0.611746 | 2.615166  | -4.096501 |
| H | -1.385801 | 0.663141  | -5.404026 |
| N | 0.920250  | 1.965146  | -0.238442 |
| C | 1.259606  | 2.856403  | 0.716278  |
| C | 0.405456  | 2.429127  | -1.434224 |

|    |           |           |           |
|----|-----------|-----------|-----------|
| C  | 1.269205  | 4.244635  | 0.435890  |
| C  | 0.359763  | 3.772014  | -1.729816 |
| C  | 0.833591  | 4.692473  | -0.782787 |
| H  | 1.603545  | 4.932017  | 1.209279  |
| H  | -0.050030 | 4.115997  | -2.674521 |
| H  | 0.825302  | 5.756876  | -1.004919 |
| C  | 2.393058  | -0.446737 | 1.315997  |
| H  | 2.956939  | -1.355056 | 1.063070  |
| H  | 3.084788  | 0.404657  | 1.282410  |
| H  | 2.020186  | -0.536184 | 2.349377  |
| Pt | 0.929540  | -0.142753 | -0.132956 |
| O  | -0.666319 | -0.109377 | 1.512993  |
| O  | -1.485541 | 0.843590  | 1.381465  |
| N  | 1.613828  | 2.413520  | 1.941067  |
| H  | 1.702524  | 3.095135  | 2.683959  |
| H  | 1.315061  | 1.487368  | 2.227522  |
| N  | 0.996440  | -3.139757 | 1.377650  |
| H  | 1.164264  | -2.238817 | 1.806896  |
| H  | 0.960818  | -3.945589 | 1.987416  |

Complex 1 <sup>3</sup>c

E = -1161.767180

Number of negative frequencies = 0

|   |           |           |           |
|---|-----------|-----------|-----------|
| N | -0.074132 | -2.273398 | -0.304592 |
| C | 0.085079  | -3.437914 | 0.341122  |
| C | -0.252861 | -2.251659 | -1.646489 |
| C | 0.053445  | -4.662992 | -0.365241 |
| C | -0.282886 | -3.414859 | -2.395918 |
| C | -0.126595 | -4.637324 | -1.727639 |
| H | 0.176913  | -5.598937 | 0.175461  |
| H | -0.397436 | -3.393473 | -3.475137 |
| H | -0.140126 | -5.567162 | -2.292111 |
| N | -0.019612 | 0.159745  | -1.549779 |
| C | -0.391411 | -0.917965 | -2.274784 |
| C | -0.064485 | 1.409683  | -2.056405 |
| C | -0.879921 | -0.748951 | -3.568374 |
| C | -0.550659 | 1.619267  | -3.345160 |
| C | -0.967959 | 0.530895  | -4.097793 |
| H | -1.213797 | -1.604233 | -4.147784 |
| H | -0.626300 | 2.623402  | -3.751108 |
| H | -1.369805 | 0.680547  | -5.096890 |
| N | 0.593251  | 2.224961  | 0.113348  |
| C | 1.065566  | 3.159221  | 0.951696  |
| C | 0.426615  | 2.510244  | -1.199250 |
| C | 1.382264  | 4.456499  | 0.484222  |
| C | 0.724245  | 3.757474  | -1.721372 |
| C | 1.209099  | 4.741435  | -0.849149 |
| H | 1.756438  | 5.202557  | 1.182145  |
| H | 0.613678  | 3.972720  | -2.779593 |
| H | 1.452317  | 5.730719  | -1.230869 |
| C | 2.388727  | -0.443158 | 0.073985  |
| H | 2.692658  | -1.312953 | 0.669223  |

|    |          |           |           |
|----|----------|-----------|-----------|
| H  | 2.506013 | -0.638679 | -0.997439 |
| H  | 2.936341 | 0.457350  | 0.375823  |
| Pt | 0.414108 | -0.113479 | 0.476835  |
| O  | 0.844284 | -0.573250 | 2.436863  |
| O  | 0.289132 | 0.215849  | 3.306157  |
| N  | 0.238806 | -3.413479 | 1.688050  |
| H  | 0.446048 | -2.535233 | 2.157668  |
| H  | 0.537182 | -4.257108 | 2.159659  |
| N  | 1.261975 | 2.813277  | 2.248355  |
| H  | 0.789794 | 1.986491  | 2.618079  |
| H  | 1.440425 | 3.552279  | 2.916177  |

Complex 1 h

E = -1161.749920

Number of negative frequencies = 0

|    |           |           |           |
|----|-----------|-----------|-----------|
| N  | 0.371646  | -2.107500 | -0.593037 |
| C  | 0.440145  | -3.215705 | 0.175061  |
| C  | -0.272644 | -2.184818 | -1.815745 |
| C  | 0.016812  | -4.472076 | -0.325029 |
| C  | -0.730321 | -3.379559 | -2.319899 |
| C  | -0.553811 | -4.549896 | -1.566483 |
| H  | 0.134000  | -5.350306 | 0.305459  |
| H  | -1.237570 | -3.415597 | -3.279200 |
| H  | -0.895486 | -5.505975 | -1.955755 |
| N  | -0.086478 | 0.167340  | -1.851468 |
| C  | -0.476844 | -0.915104 | -2.534739 |
| C  | -0.115166 | 1.414174  | -2.334778 |
| C  | -1.018102 | -0.752382 | -3.807882 |
| C  | -0.647594 | 1.635619  | -3.602754 |
| C  | -1.107304 | 0.537680  | -4.325531 |
| H  | -1.349989 | -1.602995 | -4.396565 |
| H  | -0.694086 | 2.631886  | -4.033412 |
| H  | -1.526611 | 0.687931  | -5.317441 |
| N  | 0.998208  | 1.959042  | -0.242851 |
| C  | 1.377397  | 2.852008  | 0.695901  |
| C  | 0.441384  | 2.427039  | -1.421110 |
| C  | 1.361769  | 4.243734  | 0.417840  |
| C  | 0.379646  | 3.768536  | -1.713020 |
| C  | 0.878684  | 4.691676  | -0.781064 |
| H  | 1.727455  | 4.928842  | 1.178690  |
| H  | -0.062948 | 4.111545  | -2.643261 |
| H  | 0.857499  | 5.756106  | -1.002131 |
| C  | 2.435917  | -0.500992 | 1.325191  |
| H  | 2.929782  | -1.458417 | 1.112642  |
| H  | 3.187057  | 0.297535  | 1.268772  |
| H  | 2.056162  | -0.538558 | 2.360099  |
| Pt | 1.001716  | -0.151421 | -0.138449 |
| O  | -0.617820 | -0.022035 | 1.424103  |
| O  | -1.755441 | 0.185784  | 0.908204  |
| N  | 0.941837  | -3.130514 | 1.423568  |
| H  | 0.977020  | -2.223709 | 1.873423  |
| H  | 0.837625  | -3.928580 | 2.036767  |

|   |          |          |          |
|---|----------|----------|----------|
| N | 1.815546 | 2.422867 | 1.895434 |
| H | 1.937176 | 3.101875 | 2.637033 |
| H | 1.578537 | 1.489999 | 2.211369 |

Complex 1 TS<sub>6</sub>

E = -1161.754157

Number of negative frequencies = 1

|    |           |           |           |
|----|-----------|-----------|-----------|
| N  | 0.149267  | -2.116159 | -0.342000 |
| C  | 0.279346  | -3.257164 | 0.371871  |
| C  | -0.395196 | -2.177843 | -1.610613 |
| C  | -0.147127 | -4.498063 | -0.163446 |
| C  | -0.834794 | -3.363348 | -2.156689 |
| C  | -0.707341 | -4.544597 | -1.412597 |
| H  | -0.023054 | -5.395678 | 0.438182  |
| H  | -1.283308 | -3.376804 | -3.145601 |
| H  | -1.053380 | -5.490074 | -1.823813 |
| N  | -0.292085 | 0.193461  | -1.652697 |
| C  | -0.437849 | -0.921300 | -2.381814 |
| C  | -0.066287 | 1.402642  | -2.185423 |
| C  | -0.524306 | -0.822132 | -3.769020 |
| C  | -0.137889 | 1.561287  | -3.568176 |
| C  | -0.399670 | 0.438095  | -4.350201 |
| H  | -0.642110 | -1.704134 | -4.393037 |
| H  | 0.039084  | 2.524683  | -4.038777 |
| H  | -0.451691 | 0.537892  | -5.431617 |
| N  | 0.672268  | 2.011394  | 0.052423  |
| C  | 1.038198  | 2.922554  | 0.980275  |
| C  | 0.322022  | 2.440430  | -1.211969 |
| C  | 1.141076  | 4.293698  | 0.644634  |
| C  | 0.368680  | 3.772275  | -1.562290 |
| C  | 0.803972  | 4.710629  | -0.616664 |
| H  | 1.471860  | 4.995212  | 1.406849  |
| H  | 0.065645  | 4.091097  | -2.555128 |
| H  | 0.858353  | 5.764587  | -0.878916 |
| C  | 2.559986  | -0.312370 | 0.136811  |
| H  | 2.816789  | -1.349013 | 0.379860  |
| H  | 2.826399  | -0.069790 | -0.898372 |
| H  | 3.019726  | 0.388162  | 0.841903  |
| Pt | 0.518499  | -0.105176 | 0.295607  |
| O  | 0.973644  | -0.592589 | 2.591830  |
| O  | 0.309971  | 0.104558  | 3.449260  |
| N  | 0.861451  | -3.223304 | 1.588401  |
| H  | 0.943652  | -2.350118 | 2.109447  |
| H  | 0.823365  | -4.064985 | 2.148723  |
| N  | 1.345935  | 2.502312  | 2.227215  |
| H  | 0.908269  | 1.652594  | 2.591864  |
| H  | 1.482650  | 3.224888  | 2.923900  |

Complex 1 TS<sub>2</sub>

E = -1161.727339

Number of negative frequencies = 1

|   |          |           |           |
|---|----------|-----------|-----------|
| N | 1.646633 | -1.624496 | -1.505280 |
|---|----------|-----------|-----------|

|    |           |           |           |
|----|-----------|-----------|-----------|
| C  | 2.707476  | -2.435459 | -1.314320 |
| C  | 1.279137  | -1.255515 | -2.765604 |
| C  | 3.476062  | -2.865125 | -2.417334 |
| C  | 1.996064  | -1.653007 | -3.873960 |
| C  | 3.120718  | -2.466807 | -3.683127 |
| H  | 4.334605  | -3.508972 | -2.242257 |
| H  | 1.696815  | -1.352693 | -4.873100 |
| H  | 3.705756  | -2.792350 | -4.539996 |
| N  | -0.531634 | -0.213369 | -1.625732 |
| C  | 0.059396  | -0.443926 | -2.822322 |
| C  | -1.686622 | 0.480372  | -1.558639 |
| C  | -0.484448 | 0.055436  | -4.000100 |
| C  | -2.260601 | 1.014037  | -2.709842 |
| C  | -1.651200 | 0.804495  | -3.939345 |
| H  | -0.001897 | -0.131651 | -4.954767 |
| H  | -3.194859 | 1.564482  | -2.630689 |
| H  | -2.089908 | 1.207372  | -4.848940 |
| N  | -2.549469 | -0.500211 | 0.444144  |
| C  | -3.136536 | -0.416775 | 1.641565  |
| C  | -2.348986 | 0.634603  | -0.242059 |
| C  | -3.550236 | 0.815832  | 2.191766  |
| C  | -2.734177 | 1.891102  | 0.203140  |
| C  | -3.346532 | 1.966728  | 1.460112  |
| H  | -4.018904 | 0.844598  | 3.174029  |
| H  | -2.543312 | 2.781333  | -0.392126 |
| H  | -3.657692 | 2.929740  | 1.860752  |
| C  | 2.526684  | 0.382377  | 0.930437  |
| H  | 2.685649  | 0.603631  | -0.126690 |
| H  | 2.119669  | 1.196160  | 1.524649  |
| H  | 3.308660  | -0.214982 | 1.391255  |
| Pt | 0.565029  | -0.783215 | 0.052236  |
| O  | 0.049035  | -0.146553 | 1.911885  |
| O  | 1.239838  | -0.864798 | 1.922638  |
| N  | -3.283771 | -1.584790 | 2.344600  |
| H  | -3.987811 | -1.612472 | 3.071554  |
| H  | -3.204566 | -2.437662 | 1.802916  |
| N  | 3.047103  | -2.785538 | -0.050247 |
| H  | 2.348722  | -2.729449 | 0.683454  |
| H  | 3.736495  | -3.517495 | 0.067575  |

Complex 2 a

E = -956.199443

Number of negative frequencies = 0

|   |           |           |           |
|---|-----------|-----------|-----------|
| N | -1.610005 | -1.843017 | -0.070998 |
| C | -0.744644 | -2.862426 | -0.146981 |
| C | -2.936391 | -2.114758 | 0.145091  |
| C | -1.140192 | -4.189263 | -0.036301 |
| C | -3.386631 | -3.422388 | 0.258922  |
| C | -2.483203 | -4.474969 | 0.164002  |
| H | -0.394121 | -4.975502 | -0.109313 |
| H | -4.441899 | -3.617829 | 0.429759  |
| H | -2.828305 | -5.502078 | 0.252309  |



|    |           |           |           |
|----|-----------|-----------|-----------|
| N  | -3.191264 | 0.224877  | 0.212377  |
| C  | -3.834286 | -0.951481 | 0.257283  |
| C  | -3.804095 | 1.413237  | 0.248646  |
| C  | -5.219131 | -0.967940 | 0.386200  |
| C  | -5.192391 | 1.456185  | 0.375775  |
| C  | -5.888452 | 0.253575  | 0.449436  |
| H  | -5.776678 | -1.899794 | 0.426414  |
| H  | -5.729696 | 2.399880  | 0.410058  |
| H  | -6.971068 | 0.266638  | 0.547657  |
| N  | -1.542031 | 2.259544  | -0.003204 |
| C  | -0.656081 | 3.278450  | -0.019081 |
| C  | -2.884008 | 2.559424  | 0.142814  |
| C  | -1.088008 | 4.627454  | 0.017781  |
| C  | -3.344780 | 3.854793  | 0.203844  |
| C  | -2.423749 | 4.909466  | 0.121963  |
| H  | -0.339911 | 5.415188  | -0.033040 |
| H  | -4.405430 | 4.056284  | 0.318970  |
| H  | -2.767182 | 5.940641  | 0.155136  |
| C  | 0.790976  | -0.003444 | -0.713123 |
| H  | 1.094148  | 0.750986  | -1.454923 |
| H  | 1.487098  | 0.052564  | 0.141912  |
| H  | 0.956841  | -0.980677 | -1.190941 |
| Pt | -1.196851 | 0.179575  | -0.150946 |
| N  | 0.661869  | 3.004517  | -0.096781 |
| H  | 0.982399  | 2.060360  | 0.080064  |
| H  | 1.325288  | 3.751116  | 0.062041  |
| H  | 0.297735  | -2.599125 | -0.301652 |

Complex 2<sup>3</sup>a

E = -956.115027

Number of negative frequencies = 0

|   |           |           |           |
|---|-----------|-----------|-----------|
| N | -1.608334 | -1.855579 | -0.067203 |
| C | -0.744722 | -2.876595 | -0.147207 |
| C | -2.936071 | -2.124105 | 0.148237  |
| C | -1.143015 | -4.202519 | -0.039162 |
| C | -3.388481 | -3.431506 | 0.259428  |
| C | -2.487212 | -4.485610 | 0.161804  |
| H | -0.399013 | -4.990569 | -0.114653 |
| H | -4.444571 | -3.623810 | 0.429442  |
| H | -2.834141 | -5.512359 | 0.247938  |
| N | -3.169313 | 0.208141  | 0.207567  |
| C | -3.825531 | -0.954043 | 0.261604  |
| C | -3.781121 | 1.436206  | 0.242485  |
| C | -5.210656 | -0.969234 | 0.404831  |
| C | -5.196262 | 1.461556  | 0.394589  |
| C | -5.881942 | 0.269785  | 0.477475  |
| H | -5.769538 | -1.899672 | 0.452612  |
| H | -5.735803 | 2.404128  | 0.440965  |
| H | -6.963192 | 0.280940  | 0.592985  |
| N | -1.533155 | 2.230395  | -0.029067 |
| C | -0.668815 | 3.256362  | 0.014202  |
| C | -2.898965 | 2.519941  | 0.113280  |

|    |           |           |           |
|----|-----------|-----------|-----------|
| C  | -1.083886 | 4.637491  | 0.080477  |
| C  | -3.354334 | 3.907579  | 0.131610  |
| C  | -2.455654 | 4.935860  | 0.113784  |
| H  | -0.319747 | 5.409503  | 0.108278  |
| H  | -4.422780 | 4.104434  | 0.162160  |
| H  | -2.789819 | 5.969621  | 0.132692  |
| C  | 0.805207  | 0.003942  | -0.724054 |
| H  | 1.105373  | 0.743843  | -1.483713 |
| H  | 1.508631  | 0.070543  | 0.124707  |
| H  | 0.981135  | -0.976367 | -1.192193 |
| Pt | -1.192415 | 0.169450  | -0.153317 |
| N  | 0.633651  | 3.004908  | 0.007641  |
| H  | 0.970085  | 2.044900  | -0.013421 |
| H  | 1.312298  | 3.756814  | 0.037530  |
| H  | 0.297980  | -2.614311 | -0.303163 |

Complex 2 c

E = -1106.439182

Number of negative frequencies = 0

|    |           |           |           |
|----|-----------|-----------|-----------|
| N  | -1.509891 | -1.849531 | 0.206615  |
| C  | -0.583216 | -2.807259 | 0.275684  |
| C  | -2.844954 | -2.149711 | 0.179614  |
| C  | -0.943439 | -4.148899 | 0.305796  |
| C  | -3.251564 | -3.474660 | 0.205946  |
| C  | -2.291479 | -4.482004 | 0.266499  |
| H  | -0.171713 | -4.910903 | 0.361688  |
| H  | -4.309427 | -3.722677 | 0.188672  |
| H  | -2.601867 | -5.523568 | 0.287886  |
| N  | -3.136616 | 0.192090  | 0.181570  |
| C  | -3.763962 | -0.996864 | 0.140103  |
| C  | -3.736959 | 1.390703  | 0.143227  |
| C  | -5.151602 | -1.008093 | 0.069669  |
| C  | -5.128478 | 1.424030  | 0.074008  |
| C  | -5.820774 | 0.216313  | 0.041519  |
| H  | -5.708990 | -1.940069 | 0.034841  |
| H  | -5.669374 | 2.365693  | 0.042479  |
| H  | -6.906208 | 0.227377  | -0.012821 |
| N  | -1.456288 | 2.193432  | 0.194630  |
| C  | -0.505713 | 3.151895  | 0.220770  |
| C  | -2.798303 | 2.525546  | 0.174485  |
| C  | -0.895231 | 4.517491  | 0.231688  |
| C  | -3.204450 | 3.837163  | 0.183999  |
| C  | -2.224141 | 4.846295  | 0.214008  |
| H  | -0.119879 | 5.279549  | 0.255524  |
| H  | -4.259907 | 4.091767  | 0.174108  |
| H  | -2.525254 | 5.891014  | 0.225091  |
| C  | -1.278034 | 0.169044  | -1.890561 |
| H  | -1.758474 | 1.097037  | -2.217979 |
| H  | -0.245042 | 0.118836  | -2.252162 |
| H  | -1.849716 | -0.702726 | -2.227045 |
| Pt | -1.148698 | 0.156645  | 0.197175  |
| O  | 0.187238  | 0.088221  | 1.942267  |

|   |          |           |          |
|---|----------|-----------|----------|
| O | 0.781532 | 0.023759  | 0.651218 |
| N | 0.781908 | 2.783532  | 0.210159 |
| H | 1.036054 | 1.796155  | 0.369793 |
| H | 1.493928 | 3.492791  | 0.322604 |
| H | 0.448120 | -2.460132 | 0.309234 |

Complex 2 e

E = -1106.428156

Number of negative frequencies = 0

|    |           |           |           |
|----|-----------|-----------|-----------|
| N  | -1.540991 | -1.902461 | 0.260964  |
| C  | -0.639537 | -2.886862 | 0.267946  |
| C  | -2.881279 | -2.167853 | 0.248604  |
| C  | -1.030934 | -4.218793 | 0.285048  |
| C  | -3.321653 | -3.483489 | 0.259964  |
| C  | -2.388725 | -4.516511 | 0.280523  |
| H  | -0.277584 | -5.000911 | 0.298646  |
| H  | -4.385540 | -3.704511 | 0.252949  |
| H  | -2.726158 | -5.549884 | 0.288753  |
| N  | -3.129278 | 0.184511  | 0.213358  |
| C  | -3.775844 | -0.995681 | 0.203974  |
| C  | -3.719772 | 1.381222  | 0.114430  |
| C  | -5.162301 | -0.996026 | 0.124837  |
| C  | -5.111279 | 1.430455  | 0.027417  |
| C  | -5.819194 | 0.233278  | 0.041616  |
| H  | -5.730456 | -1.922071 | 0.117061  |
| H  | -5.638258 | 2.377083  | -0.052788 |
| H  | -6.904004 | 0.254214  | -0.023007 |
| N  | -1.432830 | 2.189669  | 0.207413  |
| C  | -0.509336 | 3.177959  | 0.323483  |
| C  | -2.777667 | 2.511523  | 0.128754  |
| C  | -0.932576 | 4.536866  | 0.294467  |
| C  | -3.211371 | 3.814079  | 0.115145  |
| C  | -2.259649 | 4.846949  | 0.191428  |
| H  | -0.172370 | 5.311912  | 0.362289  |
| H  | -4.271737 | 4.041830  | 0.064957  |
| H  | -2.580839 | 5.885652  | 0.175300  |
| C  | -1.123071 | 0.086043  | -1.844794 |
| H  | -1.732904 | 0.928582  | -2.184834 |
| H  | -0.055302 | 0.212149  | -2.060597 |
| H  | -1.530604 | -0.871628 | -2.183499 |
| Pt | -1.111779 | 0.114145  | 0.216844  |
| O  | 1.614973  | 0.575969  | -0.544029 |
| O  | 0.820778  | -0.235262 | 0.250234  |
| N  | 0.778515  | 2.862904  | 0.511033  |
| H  | 1.179102  | 1.953997  | 0.127544  |
| H  | 1.419959  | 3.647689  | 0.499897  |
| H  | 0.401712  | -2.563692 | 0.258127  |

Complex 2 TS<sub>1</sub>

E = -1106.400540

Number of negative frequencies = 1

|   |           |           |          |
|---|-----------|-----------|----------|
| N | -1.563284 | -1.889507 | 0.240213 |
|---|-----------|-----------|----------|

|    |           |           |           |
|----|-----------|-----------|-----------|
| C  | -0.663510 | -2.878324 | 0.270260  |
| C  | -2.899386 | -2.169260 | 0.177993  |
| C  | -1.049287 | -4.211432 | 0.235034  |
| C  | -3.336652 | -3.485273 | 0.143011  |
| C  | -2.403387 | -4.516697 | 0.171504  |
| H  | -0.291593 | -4.989059 | 0.260877  |
| H  | -4.399375 | -3.706230 | 0.094157  |
| H  | -2.736296 | -5.551193 | 0.145091  |
| N  | -3.143720 | 0.181482  | 0.187106  |
| C  | -3.793088 | -1.002569 | 0.158591  |
| C  | -3.759818 | 1.373794  | 0.178662  |
| C  | -5.180244 | -1.011678 | 0.121828  |
| C  | -5.152926 | 1.409826  | 0.147752  |
| C  | -5.853583 | 0.209834  | 0.118788  |
| H  | -5.736658 | -1.944548 | 0.098727  |
| H  | -5.687687 | 2.355292  | 0.143317  |
| H  | -6.939980 | 0.223258  | 0.092234  |
| N  | -1.493393 | 2.214054  | 0.209668  |
| C  | -0.595698 | 3.227293  | 0.166852  |
| C  | -2.841152 | 2.518013  | 0.182534  |
| C  | -1.038890 | 4.577431  | 0.126341  |
| C  | -3.305329 | 3.811119  | 0.134117  |
| C  | -2.375877 | 4.863320  | 0.110307  |
| H  | -0.288639 | 5.364645  | 0.107375  |
| H  | -4.371385 | 4.014345  | 0.109727  |
| H  | -2.717899 | 5.894984  | 0.079241  |
| C  | 0.401288  | 0.047679  | -1.560626 |
| H  | 1.308507  | 0.633894  | -1.432738 |
| H  | 0.557638  | -0.999564 | -1.813096 |
| H  | -0.384397 | 0.542239  | -2.138835 |
| Pt | -1.167202 | 0.117019  | 0.264296  |
| O  | 1.688397  | 0.576435  | 0.977095  |
| O  | 0.811003  | -0.330700 | 0.498226  |
| N  | 0.715679  | 2.949987  | 0.119979  |
| H  | 1.092460  | 2.041265  | 0.471575  |
| H  | 1.346532  | 3.738055  | 0.201441  |
| H  | 0.378355  | -2.566275 | 0.327392  |

Complex 2 f

E = -1106.478201

Number of negative frequencies = 0

|   |           |           |           |
|---|-----------|-----------|-----------|
| N | -2.112420 | -2.313276 | -3.247284 |
| C | -1.300204 | -3.306285 | -2.827237 |
| C | -3.123429 | -2.600634 | -4.139631 |
| C | -1.462997 | -4.625397 | -3.324154 |
| C | -3.320662 | -3.865857 | -4.638400 |
| C | -2.461295 | -4.895844 | -4.220529 |
| H | -0.783906 | -5.400216 | -2.975952 |
| H | -4.124515 | -4.068745 | -5.339102 |
| H | -2.593526 | -5.903894 | -4.606035 |
| N | -3.644758 | -0.304496 | -3.916604 |
| C | -3.976131 | -1.464204 | -4.514461 |

|    |           |           |           |
|----|-----------|-----------|-----------|
| C  | -4.287397 | 0.863400  | -4.133034 |
| C  | -5.053375 | -1.480156 | -5.396599 |
| C  | -5.369561 | 0.887193  | -5.002422 |
| C  | -5.747234 | -0.298149 | -5.630043 |
| H  | -5.350242 | -2.397321 | -5.896990 |
| H  | -5.913827 | 1.807743  | -5.192981 |
| H  | -6.594066 | -0.298247 | -6.311437 |
| N  | -2.658402 | 1.681087  | -2.582512 |
| C  | -2.089359 | 2.618121  | -1.817538 |
| C  | -3.725392 | 1.990983  | -3.377132 |
| C  | -2.541200 | 3.933906  | -1.831913 |
| C  | -4.217495 | 3.285783  | -3.423850 |
| C  | -3.612510 | 4.271313  | -2.646879 |
| H  | -2.054329 | 4.672908  | -1.201842 |
| H  | -5.067662 | 3.529484  | -4.055421 |
| H  | -3.987565 | 5.291372  | -2.676597 |
| C  | 0.788242  | 0.199328  | -2.056791 |
| H  | 0.703641  | 1.257450  | -2.333458 |
| H  | 1.592833  | 0.061765  | -1.326643 |
| H  | 0.955718  | -0.420811 | -2.946659 |
| Pt | -2.112449 | -0.290145 | -2.715651 |
| O  | -0.647407 | 0.518798  | -0.250924 |
| O  | -0.425638 | -0.252050 | -1.451421 |
| N  | -0.316885 | -3.028119 | -1.952815 |
| H  | 0.205443  | -3.792733 | -1.546403 |
| H  | -0.292482 | -2.129577 | -1.471030 |
| H  | -1.290287 | 2.247081  | -1.166232 |

Complex 2 TS<sub>4</sub>

E = -1106.465844

Number of negative frequencies = 1

|   |           |           |          |
|---|-----------|-----------|----------|
| N | -1.725208 | -1.973554 | 0.396822 |
| C | -0.834962 | -2.976426 | 0.581882 |
| C | -3.076606 | -2.246007 | 0.390244 |
| C | -1.296212 | -4.321070 | 0.608954 |
| C | -3.560526 | -3.530919 | 0.446110 |
| C | -2.636839 | -4.587997 | 0.531504 |
| H | -0.563575 | -5.118177 | 0.713539 |
| H | -4.628767 | -3.725480 | 0.437858 |
| H | -2.990143 | -5.616026 | 0.560936 |
| N | -3.271298 | 0.111494  | 0.367989 |
| C | -3.942688 | -1.063020 | 0.360499 |
| C | -3.879154 | 1.322814  | 0.324768 |
| C | -5.333386 | -1.037372 | 0.338725 |
| C | -5.265831 | 1.380409  | 0.304451 |
| C | -5.988568 | 0.189342  | 0.315011 |
| H | -5.901995 | -1.963033 | 0.333297 |
| H | -5.781022 | 2.336562  | 0.270890 |
| H | -7.074629 | 0.219439  | 0.296098 |
| N | -1.617168 | 2.076695  | 0.275105 |
| C | -0.660146 | 3.006004  | 0.369441 |
| C | -2.933754 | 2.442121  | 0.312610 |

|    |           |           |           |
|----|-----------|-----------|-----------|
| C  | -0.961579 | 4.359192  | 0.443171  |
| C  | -3.291706 | 3.781153  | 0.376041  |
| C  | -2.294896 | 4.750467  | 0.430138  |
| H  | -0.157117 | 5.085410  | 0.514221  |
| H  | -4.339648 | 4.067886  | 0.397190  |
| H  | -2.562834 | 5.802861  | 0.478822  |
| C  | 1.401556  | 0.718965  | -1.479849 |
| H  | 1.170323  | 1.771679  | -1.269442 |
| H  | 2.477654  | 0.546036  | -1.346532 |
| H  | 1.099401  | 0.469225  | -2.503133 |
| Pt | -1.356911 | 0.050051  | 0.221423  |
| O  | 1.113001  | 0.055953  | 0.758581  |
| O  | 0.699521  | -0.159900 | -0.630280 |
| N  | 0.462184  | -2.688549 | 0.740125  |
| H  | 0.806644  | -1.715456 | 0.848005  |
| H  | 1.108935  | -3.448835 | 0.901631  |
| H  | 0.360506  | 2.629520  | 0.405089  |

Complex 2 g

E = -1106.511188

Number of negative frequencies = 0

|   |           |           |          |
|---|-----------|-----------|----------|
| N | -2.295090 | -1.945761 | 0.239862 |
| C | -1.402091 | -2.953020 | 0.134906 |
| C | -3.632595 | -2.224372 | 0.418220 |
| C | -1.846435 | -4.300732 | 0.188420 |
| C | -4.101612 | -3.514989 | 0.479235 |
| C | -3.178945 | -4.569587 | 0.356435 |
| H | -1.112241 | -5.097294 | 0.091270 |
| H | -5.159197 | -3.718313 | 0.618537 |
| H | -3.525699 | -5.599567 | 0.395755 |
| N | -3.854256 | 0.125980  | 0.454660 |
| C | -4.508104 | -1.046130 | 0.541158 |
| C | -4.448244 | 1.334832  | 0.538577 |
| C | -5.887668 | -1.029326 | 0.732942 |
| C | -5.822234 | 1.395637  | 0.732478 |
| C | -6.533254 | 0.199643  | 0.828020 |
| H | -6.453980 | -1.953337 | 0.808013 |
| H | -6.338400 | 2.348781  | 0.807982 |
| H | -7.609379 | 0.228710  | 0.978575 |
| N | -2.199192 | 2.106793  | 0.215143 |
| C | -1.254008 | 3.040645  | 0.079030 |
| C | -3.506475 | 2.460728  | 0.401249 |
| C | -1.562885 | 4.395174  | 0.117851 |
| C | -3.868817 | 3.798329  | 0.446978 |
| C | -2.885929 | 4.775135  | 0.302871 |
| H | -0.772886 | 5.131809  | 0.003030 |
| H | -4.907843 | 4.081058  | 0.593988 |
| H | -3.158714 | 5.827035  | 0.335686 |
| C | 2.066460  | 0.619637  | 0.829845 |
| H | 2.217667  | 1.460704  | 0.135351 |
| H | 2.542104  | 0.841730  | 1.792067 |
| H | 2.510107  | -0.292551 | 0.400447 |

|    |           |           |           |
|----|-----------|-----------|-----------|
| Pt | -1.923048 | 0.089299  | 0.178474  |
| O  | 0.702887  | 0.434688  | 1.112213  |
| O  | 0.083849  | 0.147911  | -0.169351 |
| N  | -0.104441 | -2.645640 | -0.009065 |
| H  | 0.570205  | -3.385294 | -0.147487 |
| H  | 0.187255  | -1.662941 | -0.121139 |
| H  | -0.242708 | 2.662947  | -0.063481 |

Complex 2 CP1

E = -1106.39879482

Number of negative frequencies = 2

|    |           |           |           |
|----|-----------|-----------|-----------|
| N  | -1.875810 | -1.858004 | 0.393147  |
| C  | -0.969974 | -2.840924 | 0.380375  |
| C  | -3.209127 | -2.148175 | 0.343513  |
| C  | -1.347456 | -4.177019 | 0.321002  |
| C  | -3.640508 | -3.464763 | 0.285743  |
| C  | -2.699658 | -4.490815 | 0.275528  |
| H  | -0.584758 | -4.950384 | 0.309194  |
| H  | -4.702422 | -3.691537 | 0.243427  |
| H  | -3.026638 | -5.526566 | 0.228765  |
| N  | -3.462060 | 0.201308  | 0.382651  |
| C  | -4.107694 | -0.983783 | 0.342319  |
| C  | -4.084932 | 1.390593  | 0.369607  |
| C  | -5.495079 | -0.998435 | 0.298544  |
| C  | -5.477634 | 1.421855  | 0.329352  |
| C  | -6.173852 | 0.219582  | 0.297395  |
| H  | -6.046224 | -1.934212 | 0.266531  |
| H  | -6.014823 | 2.366001  | 0.323047  |
| H  | -7.260363 | 0.228093  | 0.269270  |
| N  | -1.826738 | 2.239204  | 0.430114  |
| C  | -0.929589 | 3.250337  | 0.403203  |
| C  | -3.171519 | 2.541185  | 0.377659  |
| C  | -1.367050 | 4.598774  | 0.316594  |
| C  | -3.635669 | 3.832971  | 0.302730  |
| C  | -2.704296 | 4.883545  | 0.270432  |
| H  | -0.617345 | 5.386528  | 0.295089  |
| H  | -4.700918 | 4.036959  | 0.257653  |
| H  | -3.045404 | 5.914413  | 0.211482  |
| C  | 0.999724  | -0.007292 | -1.752843 |
| H  | 0.546453  | 0.966670  | -1.909074 |
| H  | 2.054723  | -0.073304 | -1.509957 |
| H  | 0.465067  | -0.898310 | -2.068628 |
| Pt | -1.498202 | 0.150681  | 0.456930  |
| O  | 1.263418  | 0.501520  | 1.331750  |
| O  | 0.500936  | -0.243512 | 0.551743  |
| H  | 0.071340  | -2.523013 | 0.418371  |
| N  | 0.383531  | 2.966174  | 0.426970  |
| H  | 1.021497  | 3.747144  | 0.515362  |
| H  | 0.719931  | 2.066085  | 0.807379  |

Complex 2 TS<sub>5</sub>

E = -1106.411924

Number of negative frequencies = 1

|    |           |           |           |
|----|-----------|-----------|-----------|
| N  | 0.361105  | -2.037975 | -0.600150 |
| C  | 0.539722  | -3.120703 | 0.164108  |
| C  | -0.292371 | -2.148651 | -1.801654 |
| C  | 0.099313  | -4.378930 | -0.228098 |
| C  | -0.745334 | -3.383016 | -2.240572 |
| C  | -0.546303 | -4.511133 | -1.449173 |
| H  | 0.265954  | -5.231359 | 0.423813  |
| H  | -1.264064 | -3.464157 | -3.192346 |
| H  | -0.903947 | -5.480769 | -1.786561 |
| N  | -0.130238 | 0.203854  | -1.889871 |
| C  | -0.479621 | -0.899001 | -2.568694 |
| C  | -0.105085 | 1.441933  | -2.397921 |
| C  | -0.932878 | -0.764493 | -3.875820 |
| C  | -0.546173 | 1.631812  | -3.706915 |
| C  | -0.970251 | 0.517938  | -4.427131 |
| H  | -1.233112 | -1.624581 | -4.467880 |
| H  | -0.552001 | 2.615399  | -4.168304 |
| H  | -1.319253 | 0.646620  | -5.448765 |
| N  | 0.850527  | 1.998050  | -0.236813 |
| C  | 1.179421  | 2.878364  | 0.730599  |
| C  | 0.403086  | 2.462472  | -1.459480 |
| C  | 1.240004  | 4.264895  | 0.443392  |
| C  | 0.409848  | 3.803188  | -1.763020 |
| C  | 0.868635  | 4.714136  | -0.796366 |
| H  | 1.559705  | 4.950274  | 1.224652  |
| H  | 0.055517  | 4.156221  | -2.726918 |
| H  | 0.898550  | 5.777001  | -1.023749 |
| C  | 2.351498  | -0.550722 | 1.238182  |
| H  | 2.881989  | -1.429861 | 0.845691  |
| H  | 3.053570  | 0.289642  | 1.305177  |
| H  | 1.949524  | -0.778613 | 2.234466  |
| Pt | 0.840174  | -0.095498 | -0.114371 |
| O  | -0.262670 | -0.056959 | 1.855265  |
| O  | -1.404581 | 0.478966  | 1.678407  |
| N  | 1.470968  | 2.407069  | 1.960382  |
| H  | 1.574055  | 3.077503  | 2.711622  |
| H  | 1.088479  | 1.496608  | 2.219297  |
| H  | 1.048833  | -2.962866 | 1.112404  |

Complex 2 h

E = -1106.412392

Number of negative frequencies = 0

|   |           |           |           |
|---|-----------|-----------|-----------|
| N | 0.379725  | -2.113262 | -0.595059 |
| C | 0.476609  | -3.224428 | 0.163562  |
| C | -0.248589 | -2.198359 | -1.826680 |
| C | 0.066214  | -4.485269 | -0.337571 |
| C | -0.683036 | -3.398858 | -2.336353 |
| C | -0.499026 | -4.567963 | -1.580967 |
| H | 0.195766  | -5.363548 | 0.290315  |
| H | -1.174151 | -3.442275 | -3.303643 |
| H | -0.827865 | -5.527532 | -1.972593 |



|    |           |           |           |
|----|-----------|-----------|-----------|
| N  | -0.056237 | 0.150300  | -1.879554 |
| C  | -0.461319 | -0.930141 | -2.550774 |
| C  | -0.127409 | 1.406058  | -2.337905 |
| C  | -1.030267 | -0.759913 | -3.813298 |
| C  | -0.691070 | 1.635499  | -3.588557 |
| C  | -1.142060 | 0.533303  | -4.315780 |
| H  | -1.369763 | -1.606581 | -4.403304 |
| H  | -0.771148 | 2.635536  | -4.005694 |
| H  | -1.580380 | 0.686910  | -5.298899 |
| N  | 1.062341  | 1.923550  | -0.289704 |
| C  | 1.545417  | 2.777427  | 0.618672  |
| C  | 0.434661  | 2.407117  | -1.408587 |
| C  | 1.464272  | 4.154623  | 0.457165  |
| C  | 0.330168  | 3.774191  | -1.619240 |
| C  | 0.854304  | 4.659194  | -0.682053 |
| H  | 1.874062  | 4.808372  | 1.221506  |
| H  | -0.171106 | 4.151134  | -2.506590 |
| H  | 0.773370  | 5.731619  | -0.840317 |
| C  | 2.243217  | -0.321855 | 1.498071  |
| H  | 2.841504  | -1.241761 | 1.458471  |
| H  | 2.947524  | 0.522197  | 1.490056  |
| H  | 1.682547  | -0.286756 | 2.445389  |
| Pt | 0.983416  | -0.143585 | -0.134375 |
| O  | -0.721232 | 0.073993  | 1.326553  |
| O  | -1.829834 | 0.287768  | 0.751324  |
| N  | 0.996281  | -3.135349 | 1.404434  |
| H  | 1.039089  | -2.229549 | 1.855801  |
| H  | 0.913763  | -3.935582 | 2.018127  |
| H  | 2.007247  | 2.338014  | 1.498954  |

Complex 2 <sup>3</sup>c

E = -1106.423019

Number of negative frequencies = 0

|   |           |           |           |
|---|-----------|-----------|-----------|
| N | -0.099398 | -2.249122 | -0.308358 |
| C | 0.049058  | -3.402971 | 0.342056  |
| C | -0.258246 | -2.236636 | -1.646157 |
| C | 0.030567  | -4.627779 | -0.315761 |
| C | -0.277125 | -3.425670 | -2.372921 |
| C | -0.133520 | -4.632285 | -1.696340 |
| H | 0.147927  | -5.550837 | 0.245477  |
| H | -0.378744 | -3.417473 | -3.454765 |
| H | -0.139877 | -5.568387 | -2.249835 |
| N | -0.014754 | 0.167455  | -1.561528 |
| C | -0.385297 | -0.909300 | -2.289262 |
| C | -0.058763 | 1.415921  | -2.066881 |
| C | -0.861318 | -0.745759 | -3.586138 |
| C | -0.537690 | 1.623855  | -3.360277 |
| C | -0.946158 | 0.535608  | -4.116545 |
| H | -1.188010 | -1.602705 | -4.167882 |
| H | -0.611967 | 2.627491  | -3.767764 |
| H | -1.339087 | 0.685005  | -5.119148 |
| N | 0.605680  | 2.216708  | 0.105122  |

|    |          |           |           |
|----|----------|-----------|-----------|
| C  | 1.067807 | 3.148363  | 0.951593  |
| C  | 0.424443 | 2.514784  | -1.202710 |
| C  | 1.358504 | 4.456805  | 0.497989  |
| C  | 0.697576 | 3.772902  | -1.711791 |
| C  | 1.171074 | 4.754678  | -0.830543 |
| H  | 1.723489 | 5.201012  | 1.202779  |
| H  | 0.574658 | 4.000424  | -2.766059 |
| H  | 1.392899 | 5.752993  | -1.201598 |
| C  | 2.402313 | -0.467295 | 0.049563  |
| H  | 2.700670 | -1.342746 | 0.638735  |
| H  | 2.514173 | -0.655661 | -1.023906 |
| H  | 2.957415 | 0.427592  | 0.354370  |
| Pt | 0.430128 | -0.126645 | 0.466274  |
| O  | 0.859813 | -0.635512 | 2.403706  |
| O  | 0.334529 | 0.162476  | 3.280721  |
| N  | 1.278366 | 2.790811  | 2.242692  |
| H  | 0.828447 | 1.948489  | 2.605883  |
| H  | 1.449496 | 3.524395  | 2.918262  |
| H  | 0.182830 | -3.335206 | 1.421544  |

Complex 2 TS<sub>6</sub>

E = -1106.416976

Number of negative frequencies = 0

|   |           |           |           |
|---|-----------|-----------|-----------|
| N | 0.150875  | -1.987637 | -0.343757 |
| C | 0.284038  | -3.044488 | 0.472937  |
| C | -0.302486 | -2.156499 | -1.628396 |
| C | -0.028383 | -4.327316 | 0.057508  |
| C | -0.624063 | -3.428763 | -2.090110 |
| C | -0.488579 | -4.520631 | -1.243955 |
| H | 0.089720  | -5.157073 | 0.748184  |
| H | -0.989583 | -3.558922 | -3.105655 |
| H | -0.743060 | -5.516797 | -1.597096 |
| N | -0.156400 | 0.195227  | -1.708634 |
| C | -0.397002 | -0.935692 | -2.425718 |
| C | -0.053605 | 1.429759  | -2.260978 |
| C | -0.656560 | -0.822983 | -3.784600 |
| C | -0.311049 | 1.573636  | -3.619019 |
| C | -0.628979 | 0.442860  | -4.371765 |
| H | -0.862227 | -1.702992 | -4.388402 |
| H | -0.250960 | 2.548478  | -4.095731 |
| H | -0.827591 | 0.545322  | -5.435392 |
| N | 0.701580  | 2.014293  | -0.048300 |
| C | 1.084621  | 2.899484  | 0.899921  |
| C | 0.363456  | 2.463922  | -1.313802 |
| C | 1.168191  | 4.276775  | 0.594135  |
| C | 0.431629  | 3.800918  | -1.642190 |
| C | 0.846138  | 4.716174  | -0.666860 |
| H | 1.486731  | 4.966704  | 1.371740  |
| H | 0.159195  | 4.137148  | -2.638403 |
| H | 0.903687  | 5.775453  | -0.905546 |
| C | 2.646872  | -0.366631 | 0.395697  |
| H | 3.098256  | -0.293954 | -0.597435 |

|    |           |           |          |
|----|-----------|-----------|----------|
| H  | 3.016280  | 0.411479  | 1.070225 |
| H  | 2.765492  | -1.365472 | 0.827976 |
| Pt | 0.534315  | -0.044177 | 0.121256 |
| O  | 0.665046  | -0.384163 | 2.277342 |
| O  | -0.507386 | -0.669347 | 2.730005 |
| H  | 0.648313  | -2.829545 | 1.475105 |
| N  | 1.416959  | 2.447469  | 2.126741 |
| H  | 1.565614  | 3.123125  | 2.864903 |
| H  | 1.164595  | 1.506963  | 2.420801 |

Complex 2 TS<sub>2</sub> Conformation 1

E = -1106.384169

Number of negative frequencies = 1

|    |           |           |           |
|----|-----------|-----------|-----------|
| N  | 1.669373  | -1.578024 | -1.472601 |
| C  | 2.742539  | -2.356547 | -1.272867 |
| C  | 1.287725  | -1.252297 | -2.729893 |
| C  | 3.499404  | -2.837956 | -2.330062 |
| C  | 2.010083  | -1.699656 | -3.829928 |
| C  | 3.129741  | -2.497247 | -3.626794 |
| H  | 4.363509  | -3.464559 | -2.129772 |
| H  | 1.701552  | -1.433573 | -4.837069 |
| H  | 3.706250  | -2.851525 | -4.477647 |
| N  | -0.517253 | -0.193276 | -1.609487 |
| C  | 0.069027  | -0.440847 | -2.805226 |
| C  | -1.676134 | 0.492249  | -1.550624 |
| C  | -0.473991 | 0.039861  | -3.989301 |
| C  | -2.251164 | 1.011334  | -2.709460 |
| C  | -1.641827 | 0.790523  | -3.936124 |
| H  | 0.008486  | -0.160360 | -4.941576 |
| H  | -3.187980 | 1.558364  | -2.636896 |
| H  | -2.081452 | 1.183118  | -4.849678 |
| N  | -2.525677 | -0.494182 | 0.451071  |
| C  | -3.119531 | -0.420394 | 1.645588  |
| C  | -2.345849 | 0.642819  | -0.237467 |
| C  | -3.562106 | 0.804726  | 2.190148  |
| C  | -2.759336 | 1.892008  | 0.202056  |
| C  | -3.379215 | 1.957616  | 1.456225  |
| H  | -4.036038 | 0.825811  | 3.170070  |
| H  | -2.585165 | 2.784803  | -0.394436 |
| H  | -3.712546 | 2.914775  | 1.853016  |
| C  | 2.554766  | 0.395123  | 0.948758  |
| H  | 2.708990  | 0.635865  | -0.105134 |
| H  | 2.198189  | 1.217338  | 1.563294  |
| H  | 3.323242  | -0.237306 | 1.386728  |
| Pt | 0.587233  | -0.739339 | 0.076938  |
| O  | 0.057365  | -0.077430 | 1.915727  |
| O  | 1.244129  | -0.798945 | 1.955343  |
| N  | -3.243719 | -1.589135 | 2.351085  |
| H  | -3.947885 | -1.631430 | 3.077131  |
| H  | -3.139882 | -2.442261 | 1.813980  |
| H  | 2.986129  | -2.587410 | -0.237919 |

Complex 2 TS<sub>2</sub> Conformation 2

E = -1106.385459

Number of negative frequencies = 1

|    |           |           |           |
|----|-----------|-----------|-----------|
| N  | 1.666862  | -1.613167 | -1.521572 |
| C  | 2.745887  | -2.401129 | -1.334626 |
| C  | 1.279375  | -1.260571 | -2.780235 |
| C  | 3.514866  | -2.818470 | -2.442218 |
| C  | 1.994514  | -1.649607 | -3.892641 |
| C  | 3.139042  | -2.436608 | -3.707003 |
| H  | 4.388107  | -3.443234 | -2.271161 |
| H  | 1.678674  | -1.364700 | -4.891139 |
| H  | 3.722595  | -2.755780 | -4.567257 |
| N  | -0.546861 | -0.254767 | -1.629863 |
| C  | 0.043504  | -0.473688 | -2.829399 |
| C  | -1.702695 | 0.437029  | -1.559567 |
| C  | -0.510753 | 0.020730  | -4.004618 |
| C  | -2.286852 | 0.966592  | -2.706858 |
| C  | -1.684744 | 0.757153  | -3.940150 |
| H  | -0.028943 | -0.159212 | -4.960972 |
| H  | -3.221855 | 1.515233  | -2.622733 |
| H  | -2.131730 | 1.154682  | -4.847980 |
| N  | -2.596674 | -0.519065 | 0.450407  |
| C  | -3.183357 | -0.396995 | 1.641240  |
| C  | -2.354052 | 0.603475  | -0.238534 |
| C  | -3.549034 | 0.828734  | 2.195528  |
| C  | -2.694517 | 1.875541  | 0.219255  |
| C  | -3.299014 | 1.985860  | 1.467987  |
| H  | -4.019168 | 0.868720  | 3.175319  |
| H  | -2.470163 | 2.757046  | -0.379014 |
| H  | -3.566643 | 2.962857  | 1.865282  |
| C  | 2.428185  | 0.338505  | 1.030065  |
| H  | 2.605540  | 0.619914  | -0.009655 |
| H  | 1.958646  | 1.096464  | 1.651359  |
| H  | 3.228667  | -0.237866 | 1.485534  |
| Pt | 0.540534  | -0.859352 | 0.043873  |
| O  | -0.032665 | -0.391632 | 1.944380  |
| O  | 1.195354  | -1.043282 | 1.909593  |
| N  | 3.101570  | -2.742811 | -0.072479 |
| H  | 2.406804  | -2.708523 | 0.666770  |
| H  | 3.811431  | -3.456039 | 0.039049  |
| H  | -3.370154 | -1.324800 | 2.182829  |

Complex 3 a

E = -900.860845

Number of negative frequencies = 0

|   |           |           |           |
|---|-----------|-----------|-----------|
| N | -1.639166 | -1.862202 | -0.085025 |
| C | -0.775085 | -2.873909 | -0.227948 |
| C | -2.967653 | -2.140917 | 0.115610  |
| C | -1.170389 | -4.205305 | -0.181367 |
| C | -3.416308 | -3.452521 | 0.171119  |
| C | -2.511226 | -4.498657 | 0.021596  |
| H | -0.427409 | -4.988196 | -0.304611 |

|    |           |           |           |
|----|-----------|-----------|-----------|
| H  | -4.471187 | -3.659694 | 0.330876  |
| H  | -2.855661 | -5.528966 | 0.063059  |
| N  | -3.232229 | 0.194608  | 0.174210  |
| C  | -3.868700 | -0.979284 | 0.262565  |
| C  | -3.828023 | 1.390197  | 0.269267  |
| C  | -5.246036 | -0.986297 | 0.471113  |
| C  | -5.203944 | 1.442993  | 0.478247  |
| C  | -5.900999 | 0.239588  | 0.577633  |
| H  | -5.806892 | -1.913662 | 0.550323  |
| H  | -5.732733 | 2.388521  | 0.563841  |
| H  | -6.975663 | 0.257916  | 0.740980  |
| N  | -1.569063 | 2.199070  | -0.063952 |
| C  | -0.664628 | 3.176187  | -0.196964 |
| C  | -2.888255 | 2.522311  | 0.129652  |
| C  | -1.012166 | 4.520678  | -0.151591 |
| C  | -3.288577 | 3.849586  | 0.183503  |
| C  | -2.343872 | 4.861291  | 0.040170  |
| H  | -0.241871 | 5.277797  | -0.267938 |
| H  | -4.335982 | 4.095910  | 0.336482  |
| H  | -2.650798 | 5.903530  | 0.078332  |
| C  | 0.809966  | 0.205288  | -0.424080 |
| H  | 1.050912  | 0.768785  | -1.340783 |
| H  | 1.306426  | 0.712619  | 0.419771  |
| H  | 1.266760  | -0.790883 | -0.523366 |
| Pt | -1.231980 | 0.168503  | -0.125872 |
| H  | 0.264163  | -2.597893 | -0.385399 |
| H  | 0.364143  | 2.856117  | -0.344924 |

Complex 3<sup>3</sup>a

E = -900.782549

Number of negative frequencies = 0

|   |           |           |          |
|---|-----------|-----------|----------|
| N | -1.563569 | -1.853893 | 0.287402 |
| C | -0.665843 | -2.858304 | 0.263621 |
| C | -2.911275 | -2.140227 | 0.204779 |
| C | -1.042944 | -4.183333 | 0.176543 |
| C | -3.335615 | -3.467931 | 0.100376 |
| C | -2.406676 | -4.492278 | 0.091508 |
| H | -0.283352 | -4.959908 | 0.179949 |
| H | -4.397856 | -3.686678 | 0.019415 |
| H | -2.734651 | -5.526064 | 0.013637 |
| N | -3.165627 | 0.204276  | 0.181486 |
| C | -3.809479 | -0.998940 | 0.246112 |
| C | -3.776226 | 1.424882  | 0.243457 |
| C | -5.193214 | -0.988275 | 0.347373 |
| C | -5.159848 | 1.451312  | 0.345966 |
| C | -5.863705 | 0.240936  | 0.388806 |
| H | -5.755971 | -1.917746 | 0.398004 |
| H | -5.697718 | 2.395408  | 0.396881 |
| H | -6.947521 | 0.255991  | 0.469884 |
| N | -1.506503 | 2.217298  | 0.278558 |
| C | -0.581721 | 3.196050  | 0.249064 |
| C | -2.846521 | 2.540517  | 0.197589 |

|    |           |           |           |
|----|-----------|-----------|-----------|
| C  | -0.921898 | 4.530947  | 0.158238  |
| C  | -3.233775 | 3.879296  | 0.090148  |
| C  | -2.276652 | 4.877380  | 0.075850  |
| H  | -0.141191 | 5.286263  | 0.156870  |
| H  | -4.289768 | 4.127372  | 0.011275  |
| H  | -2.576208 | 5.919615  | -0.004029 |
| C  | 0.360076  | 0.151251  | -1.136107 |
| H  | 0.309009  | 1.053636  | -1.752829 |
| H  | 1.267001  | 0.146411  | -0.509494 |
| H  | 0.291387  | -0.756881 | -1.742492 |
| Pt | -1.170633 | 0.175800  | 0.281257  |
| H  | 0.379372  | -2.562880 | 0.330516  |
| H  | 0.454991  | 2.871800  | 0.314916  |

Complex 3 c

E = -1051.088663

Number of negative frequencies = 0

|    |           |           |           |
|----|-----------|-----------|-----------|
| N  | -1.504523 | -1.836777 | 0.201024  |
| C  | -0.572698 | -2.789335 | 0.274398  |
| C  | -2.839072 | -2.146703 | 0.182431  |
| C  | -0.924469 | -4.133117 | 0.317505  |
| C  | -3.236805 | -3.473687 | 0.221496  |
| C  | -2.270258 | -4.474906 | 0.286701  |
| H  | -0.147676 | -4.889703 | 0.376671  |
| H  | -4.293341 | -3.727998 | 0.210773  |
| H  | -2.574123 | -5.518105 | 0.318348  |
| N  | -3.147585 | 0.188629  | 0.171968  |
| C  | -3.768512 | -1.000629 | 0.136432  |
| C  | -3.750652 | 1.386622  | 0.122824  |
| C  | -5.157964 | -1.014433 | 0.063547  |
| C  | -5.139887 | 1.420009  | 0.050144  |
| C  | -5.829128 | 0.207660  | 0.025707  |
| H  | -5.714132 | -1.947473 | 0.034872  |
| H  | -5.682493 | 2.360690  | 0.011572  |
| H  | -6.914473 | 0.215498  | -0.029817 |
| N  | -1.473663 | 2.186553  | 0.183074  |
| C  | -0.526595 | 3.124476  | 0.248143  |
| C  | -2.803194 | 2.518155  | 0.157679  |
| C  | -0.856042 | 4.474279  | 0.275996  |
| C  | -3.178681 | 3.852002  | 0.180836  |
| C  | -2.195799 | 4.837783  | 0.237778  |
| H  | -0.067103 | 5.218672  | 0.328346  |
| H  | -4.230690 | 4.123886  | 0.163700  |
| H  | -2.482594 | 5.886119  | 0.256935  |
| C  | -1.318671 | 0.156497  | -1.913009 |
| H  | -1.752699 | 1.103164  | -2.252780 |
| H  | -0.296547 | 0.043140  | -2.289957 |
| H  | -1.942524 | -0.686332 | -2.230705 |
| Pt | -1.158057 | 0.172211  | 0.178651  |
| O  | 0.174784  | 0.169113  | 1.899960  |
| O  | 0.770622  | 0.156490  | 0.610437  |
| H  | 0.457403  | -2.438323 | 0.300301  |

H 0.497690 2.757530 0.279675

Complex 3 TS<sub>1</sub>

E = -1051.057777

Number of negative frequencies = 1

|    |           |           |           |
|----|-----------|-----------|-----------|
| N  | -1.589943 | -1.915237 | 0.256780  |
| C  | -0.690492 | -2.902631 | 0.310349  |
| C  | -2.926836 | -2.196629 | 0.185421  |
| C  | -1.073421 | -4.237181 | 0.292338  |
| C  | -3.361625 | -3.513934 | 0.163732  |
| C  | -2.426843 | -4.543592 | 0.217723  |
| H  | -0.316054 | -5.014082 | 0.340802  |
| H  | -4.423442 | -3.738507 | 0.109508  |
| H  | -2.758434 | -5.578768 | 0.203726  |
| N  | -3.178732 | 0.150858  | 0.190442  |
| C  | -3.825915 | -1.030507 | 0.142939  |
| C  | -3.786721 | 1.351363  | 0.147574  |
| C  | -5.213409 | -1.030655 | 0.059227  |
| C  | -5.174843 | 1.395880  | 0.065657  |
| C  | -5.878614 | 0.194206  | 0.023504  |
| H  | -5.775336 | -1.959831 | 0.019391  |
| H  | -5.706738 | 2.342903  | 0.031358  |
| H  | -6.963287 | 0.211849  | -0.042168 |
| N  | -1.519172 | 2.143085  | 0.282474  |
| C  | -0.580112 | 3.091388  | 0.350898  |
| C  | -2.843984 | 2.479986  | 0.193816  |
| C  | -0.912007 | 4.441878  | 0.321027  |
| C  | -3.224815 | 3.812493  | 0.164132  |
| C  | -2.248598 | 4.804469  | 0.226815  |
| H  | -0.125384 | 5.188810  | 0.380137  |
| H  | -4.276011 | 4.080043  | 0.097980  |
| H  | -2.538331 | 5.852222  | 0.206860  |
| C  | 0.313151  | -0.002228 | -1.589068 |
| H  | 0.917480  | 0.903344  | -1.538356 |
| H  | 0.875013  | -0.928508 | -1.690918 |
| H  | -0.569251 | 0.052216  | -2.233654 |
| Pt | -1.205688 | 0.103846  | 0.275654  |
| O  | 1.545012  | 0.987693  | 0.724295  |
| O  | 0.814831  | -0.104861 | 0.481607  |
| H  | 0.351722  | -2.592514 | 0.374810  |
| H  | 0.441688  | 2.711022  | 0.451865  |

Complex 3 f

E = -1051.134375

Number of negative frequencies = 0

|   |           |           |          |
|---|-----------|-----------|----------|
| N | -1.899349 | -1.866963 | 0.272803 |
| C | -0.991598 | -2.847180 | 0.268030 |
| C | -3.232881 | -2.163711 | 0.301762 |
| C | -1.363783 | -4.186297 | 0.278092 |
| C | -3.660169 | -3.482086 | 0.315142 |
| C | -2.714977 | -4.505063 | 0.300009 |
| H | -0.597921 | -4.956325 | 0.269419 |

|    |           |           |           |
|----|-----------|-----------|-----------|
| H  | -4.721171 | -3.715439 | 0.338350  |
| H  | -3.037975 | -5.542967 | 0.308288  |
| N  | -3.493034 | 0.183522  | 0.326021  |
| C  | -4.136957 | -1.001367 | 0.319002  |
| C  | -4.114851 | 1.378956  | 0.324399  |
| C  | -5.526596 | -1.010900 | 0.325581  |
| C  | -5.504933 | 1.413031  | 0.331303  |
| C  | -6.201975 | 0.207535  | 0.334399  |
| H  | -6.081173 | -1.945137 | 0.322059  |
| H  | -6.042494 | 2.357261  | 0.332694  |
| H  | -7.288669 | 0.217160  | 0.340194  |
| N  | -1.858713 | 2.188428  | 0.304984  |
| C  | -0.920303 | 3.138649  | 0.316869  |
| C  | -3.184434 | 2.519345  | 0.314976  |
| C  | -1.261298 | 4.488364  | 0.317470  |
| C  | -3.577267 | 3.847789  | 0.323739  |
| C  | -2.602572 | 4.844338  | 0.319692  |
| H  | -0.476714 | 5.239758  | 0.322207  |
| H  | -4.631680 | 4.110315  | 0.335959  |
| H  | -2.897927 | 5.890736  | 0.324289  |
| C  | 1.061391  | 0.066948  | -1.138329 |
| H  | 0.867074  | 1.052922  | -1.581148 |
| H  | 2.139837  | -0.112245 | -1.072918 |
| H  | 0.571443  | -0.722828 | -1.722086 |
| Pt | -1.547151 | 0.153580  | 0.272542  |
| O  | 1.166195  | 1.049372  | 0.958721  |
| O  | 0.529501  | 0.011643  | 0.185559  |
| H  | 0.105825  | 2.754864  | 0.360980  |
| H  | 0.050393  | -2.531832 | 0.259703  |

Complex 3 TS<sub>4</sub>

E = -1051.119763

Number of negative frequencies = 1

|   |           |           |          |
|---|-----------|-----------|----------|
| N | -1.744030 | -1.930179 | 0.328366 |
| C | -0.841474 | -2.917452 | 0.318336 |
| C | -3.079141 | -2.213081 | 0.404855 |
| C | -1.226703 | -4.250479 | 0.377796 |
| C | -3.516889 | -3.527805 | 0.468187 |
| C | -2.580434 | -4.557005 | 0.453386 |
| H | -0.468686 | -5.028270 | 0.367609 |
| H | -4.578786 | -3.750104 | 0.530956 |
| H | -2.910200 | -5.591657 | 0.502979 |
| N | -3.285214 | 0.135745  | 0.364795 |
| C | -3.958554 | -1.039929 | 0.407893 |
| C | -3.894103 | 1.345820  | 0.334095 |
| C | -5.346983 | -1.019065 | 0.430887 |
| C | -5.282621 | 1.399019  | 0.349408 |
| C | -6.003746 | 0.208875  | 0.400202 |
| H | -5.914655 | -1.944957 | 0.464737 |
| H | -5.801122 | 2.353708  | 0.322962 |
| H | -7.089809 | 0.238592  | 0.413783 |
| N | -1.629822 | 2.102940  | 0.309138 |



|    |           |           |           |
|----|-----------|-----------|-----------|
| C  | -0.672837 | 3.034867  | 0.366134  |
| C  | -2.948221 | 2.465709  | 0.313261  |
| C  | -0.979088 | 4.389679  | 0.385271  |
| C  | -3.309045 | 3.805187  | 0.331737  |
| C  | -2.313187 | 4.777231  | 0.358517  |
| H  | -0.176936 | 5.121017  | 0.423972  |
| H  | -4.357258 | 4.091670  | 0.332473  |
| H  | -2.583487 | 5.830202  | 0.369664  |
| C  | 1.418068  | 0.473123  | -1.306564 |
| H  | 1.011588  | 1.490537  | -1.391328 |
| H  | 2.485431  | 0.519338  | -1.053324 |
| H  | 1.273744  | -0.064792 | -2.250651 |
| Pt | -1.370708 | 0.070673  | 0.285670  |
| O  | 0.947689  | 0.375964  | 0.991561  |
| O  | 0.747282  | -0.270692 | -0.310931 |
| H  | 0.344691  | 2.647664  | 0.418131  |
| H  | 0.199752  | -2.606159 | 0.259769  |

Complex 3 g

E = -1051.168171

Number of negative frequencies = 0

|   |           |           |           |
|---|-----------|-----------|-----------|
| N | -2.244760 | -2.001172 | 0.688743  |
| C | -1.384337 | -3.018253 | 0.793652  |
| C | -3.576310 | -2.239475 | 0.495134  |
| C | -1.806636 | -4.339546 | 0.715414  |
| C | -4.051244 | -3.539912 | 0.409747  |
| C | -3.156997 | -4.601007 | 0.521050  |
| H | -1.079704 | -5.141423 | 0.807059  |
| H | -5.110787 | -3.727498 | 0.256851  |
| H | -3.518545 | -5.624157 | 0.455032  |
| N | -3.736261 | 0.115536  | 0.486119  |
| C | -4.423769 | -1.040185 | 0.385224  |
| C | -4.307253 | 1.332389  | 0.418111  |
| C | -5.800041 | -0.994422 | 0.195700  |
| C | -5.682304 | 1.425401  | 0.226207  |
| C | -6.421272 | 0.250262  | 0.116348  |
| H | -6.384601 | -1.906425 | 0.112290  |
| H | -6.177788 | 2.390489  | 0.165372  |
| H | -7.496778 | 0.305061  | -0.030593 |
| N | -2.039943 | 2.055400  | 0.760883  |
| C | -1.099365 | 2.990049  | 0.937821  |
| C | -3.343333 | 2.432194  | 0.578815  |
| C | -1.400428 | 4.346943  | 0.937192  |
| C | -3.698306 | 3.773086  | 0.566370  |
| C | -2.716672 | 4.743235  | 0.746529  |
| H | -0.605417 | 5.072227  | 1.085332  |
| H | -4.735579 | 4.062190  | 0.419507  |
| H | -2.984771 | 5.796838  | 0.740045  |
| C | 1.379179  | 0.820441  | -0.425076 |
| H | 0.498196  | 0.928097  | -1.079175 |
| H | 2.021913  | 1.704216  | -0.518804 |
| H | 1.939662  | -0.081270 | -0.708314 |

|    |           |           |          |
|----|-----------|-----------|----------|
| Pt | -1.798687 | -0.005970 | 0.770669 |
| O  | 0.990245  | 0.769004  | 0.929677 |
| O  | 0.147892  | -0.366467 | 1.091430 |
| H  | -0.089427 | 2.609186  | 1.084663 |
| H  | -0.341548 | -2.740651 | 0.941468 |

Complex 3 CP1

E = -1051.05517118

Number of negative frequencies = 2

|    |           |           |           |
|----|-----------|-----------|-----------|
| N  | -1.900417 | -1.879759 | 0.391259  |
| C  | -0.993516 | -2.860916 | 0.379468  |
| C  | -3.234513 | -2.172904 | 0.348579  |
| C  | -1.367012 | -4.198644 | 0.326994  |
| C  | -3.662666 | -3.490950 | 0.299636  |
| C  | -2.719135 | -4.514843 | 0.288527  |
| H  | -0.603144 | -4.970646 | 0.316051  |
| H  | -4.724010 | -3.721855 | 0.265801  |
| H  | -3.043681 | -5.551591 | 0.247399  |
| N  | -3.500470 | 0.173173  | 0.378036  |
| C  | -4.141637 | -1.011040 | 0.345487  |
| C  | -4.122057 | 1.366156  | 0.363533  |
| C  | -5.530954 | -1.023724 | 0.305917  |
| C  | -5.512358 | 1.401225  | 0.325706  |
| C  | -6.207370 | 0.194687  | 0.299749  |
| H  | -6.085650 | -1.957443 | 0.280374  |
| H  | -6.052685 | 2.343797  | 0.316517  |
| H  | -7.293888 | 0.202953  | 0.271150  |
| N  | -1.863954 | 2.184255  | 0.431865  |
| C  | -0.936361 | 3.144608  | 0.421390  |
| C  | -3.191042 | 2.507665  | 0.375891  |
| C  | -1.280941 | 4.490544  | 0.349532  |
| C  | -3.590592 | 3.833629  | 0.319332  |
| C  | -2.624093 | 4.836937  | 0.301873  |
| H  | -0.499764 | 5.245017  | 0.333470  |
| H  | -4.646209 | 4.088682  | 0.282453  |
| H  | -2.927024 | 5.879819  | 0.250015  |
| C  | 1.028323  | -0.000809 | -1.703607 |
| H  | 0.595765  | 0.983817  | -1.855436 |
| H  | 2.073765  | -0.081325 | -1.426897 |
| H  | 0.501189  | -0.876044 | -2.071973 |
| Pt | -1.535276 | 0.141771  | 0.448071  |
| O  | 1.106122  | 0.982703  | 1.122603  |
| O  | 0.484928  | -0.033837 | 0.557981  |
| H  | 0.047942  | -2.542794 | 0.413496  |
| H  | 0.092717  | 2.786977  | 0.495335  |

Complex 3 TS<sub>5</sub>

E = -1051.065791

Number of negative frequencies = 1

|   |           |           |           |
|---|-----------|-----------|-----------|
| N | 0.224377  | -2.033891 | -0.538170 |
| C | 0.355398  | -3.105145 | 0.249597  |
| C | -0.320278 | -2.162050 | -1.791136 |

|    |           |           |           |
|----|-----------|-----------|-----------|
| C  | -0.038271 | -4.372413 | -0.164606 |
| C  | -0.722405 | -3.404842 | -2.253125 |
| C  | -0.581296 | -4.522086 | -1.432432 |
| H  | 0.082773  | -5.217216 | 0.506929  |
| H  | -1.155813 | -3.503488 | -3.245115 |
| H  | -0.901512 | -5.498648 | -1.786804 |
| N  | -0.134155 | 0.187311  | -1.892685 |
| C  | -0.447270 | -0.918605 | -2.582361 |
| C  | -0.095978 | 1.431688  | -2.390438 |
| C  | -0.820869 | -0.781670 | -3.915521 |
| C  | -0.464299 | 1.621594  | -3.718776 |
| C  | -0.830958 | 0.501168  | -4.465033 |
| H  | -1.086166 | -1.640514 | -4.525638 |
| H  | -0.458116 | 2.606705  | -4.176981 |
| H  | -1.115601 | 0.628542  | -5.506493 |
| N  | 0.794050  | 1.970876  | -0.202434 |
| C  | 1.178365  | 2.818184  | 0.755238  |
| C  | 0.361340  | 2.445289  | -1.414478 |
| C  | 1.181152  | 4.194107  | 0.556442  |
| C  | 0.353815  | 3.807921  | -1.665680 |
| C  | 0.771283  | 4.691602  | -0.672380 |
| H  | 1.501246  | 4.851935  | 1.359081  |
| H  | 0.011537  | 4.185080  | -2.625899 |
| H  | 0.765113  | 5.761954  | -0.861994 |
| C  | 2.348999  | -0.480753 | 1.110629  |
| H  | 2.886422  | -1.295962 | 0.610153  |
| H  | 2.973245  | 0.421199  | 1.123498  |
| H  | 2.065269  | -0.768403 | 2.128949  |
| Pt | 0.652730  | -0.083659 | -0.036828 |
| O  | -0.083308 | -0.021823 | 2.011127  |
| O  | -1.320824 | 0.302145  | 1.809318  |
| H  | 1.482891  | 2.364887  | 1.696513  |
| H  | 0.786113  | -2.925433 | 1.232260  |

Complex 3 <sup>3</sup>c

E = -1051.077817

Number of negative frequencies = 0

|   |           |           |           |
|---|-----------|-----------|-----------|
| N | -0.131186 | -2.244571 | -0.300339 |
| C | -0.018784 | -3.394501 | 0.364435  |
| C | -0.279295 | -2.249049 | -1.640323 |
| C | -0.065077 | -4.627904 | -0.276423 |
| C | -0.322847 | -3.446656 | -2.351664 |
| C | -0.216477 | -4.647518 | -1.658227 |
| H | 0.021308  | -5.545674 | 0.298968  |
| H | -0.417519 | -3.451198 | -3.434069 |
| H | -0.242438 | -5.590681 | -2.199062 |
| N | -0.012934 | 0.145904  | -1.569675 |
| C | -0.368743 | -0.928184 | -2.302529 |
| C | -0.031523 | 1.395930  | -2.076955 |
| C | -0.790297 | -0.763520 | -3.620084 |
| C | -0.449023 | 1.605230  | -3.389113 |
| C | -0.833791 | 0.515291  | -4.158894 |

|    |           |           |           |
|----|-----------|-----------|-----------|
| H  | -1.099222 | -1.618542 | -4.214428 |
| H  | -0.488957 | 2.606619  | -3.807242 |
| H  | -1.173850 | 0.663935  | -5.180671 |
| N  | 0.611461  | 2.170950  | 0.110730  |
| C  | 1.024746  | 3.090618  | 0.981025  |
| C  | 0.412943  | 2.490164  | -1.183564 |
| C  | 1.255074  | 4.409130  | 0.603785  |
| C  | 0.630036  | 3.791296  | -1.633221 |
| C  | 1.053082  | 4.757794  | -0.726490 |
| H  | 1.585246  | 5.138094  | 1.338890  |
| H  | 0.486572  | 4.056767  | -2.676829 |
| H  | 1.227154  | 5.776930  | -1.063809 |
| C  | 2.446325  | -0.505409 | -0.078680 |
| H  | 2.752821  | -1.383865 | 0.501881  |
| H  | 2.504017  | -0.703224 | -1.154676 |
| H  | 3.039347  | 0.375691  | 0.192110  |
| Pt | 0.503473  | -0.114541 | 0.446252  |
| O  | 1.141318  | -0.349465 | 2.372979  |
| O  | 0.607475  | 0.540030  | 3.148625  |
| H  | 0.109997  | -3.314939 | 1.443639  |
| H  | 1.159107  | 2.747404  | 2.007684  |

Complex 3 TS<sub>2</sub>

E = -1051.042519

Number of negative frequencies = 1

|   |           |           |           |
|---|-----------|-----------|-----------|
| N | 1.725300  | -1.526520 | -1.506435 |
| C | 2.844510  | -2.238400 | -1.309729 |
| C | 1.302282  | -1.255847 | -2.762450 |
| C | 3.603147  | -2.711098 | -2.369132 |
| C | 2.021351  | -1.701186 | -3.865610 |
| C | 3.184109  | -2.435431 | -3.666038 |
| H | 4.503115  | -3.285428 | -2.169843 |
| H | 1.675143  | -1.486675 | -4.872659 |
| H | 3.755475  | -2.791739 | -4.519447 |
| N | -0.526350 | -0.247857 | -1.629190 |
| C | 0.052409  | -0.494489 | -2.829944 |
| C | -1.681826 | 0.442891  | -1.570594 |
| C | -0.511184 | -0.039308 | -4.014470 |
| C | -2.276708 | 0.939218  | -2.728752 |
| C | -1.688064 | 0.695559  | -3.961103 |
| H | -0.033608 | -0.243908 | -4.968192 |
| H | -3.210246 | 1.491247  | -2.650550 |
| H | -2.144117 | 1.066823  | -4.875405 |
| N | -2.599014 | -0.457135 | 0.453744  |
| C | -3.186345 | -0.299210 | 1.640279  |
| C | -2.325350 | 0.647748  | -0.251074 |
| C | -3.519745 | 0.944928  | 2.173684  |
| C | -2.631779 | 1.936187  | 0.183951  |
| C | -3.235641 | 2.083318  | 1.429067  |
| H | -3.991851 | 1.013541  | 3.150955  |
| H | -2.383854 | 2.800997  | -0.429412 |
| H | -3.477040 | 3.073662  | 1.809877  |

|    |           |           |           |
|----|-----------|-----------|-----------|
| C  | 2.405907  | 0.324611  | 1.123486  |
| H  | 2.567497  | 0.692416  | 0.108084  |
| H  | 1.965194  | 1.041548  | 1.810995  |
| H  | 3.210939  | -0.290072 | 1.518965  |
| Pt | 0.561109  | -0.847505 | 0.055252  |
| O  | -0.070688 | -0.449063 | 1.945285  |
| O  | 1.169355  | -1.077560 | 1.936896  |
| H  | 3.121885  | -2.428300 | -0.275241 |
| H  | -3.401129 | -1.212226 | 2.196318  |

Complex 4 a

E = -979.424294

Number of negative frequencies = 0

|    |           |           |           |
|----|-----------|-----------|-----------|
| N  | -1.501721 | -1.937326 | 0.036197  |
| C  | -0.642127 | -2.979542 | 0.061002  |
| C  | -2.840609 | -2.184007 | 0.240013  |
| C  | -1.111679 | -4.293029 | 0.183204  |
| C  | -3.337154 | -3.470033 | 0.369240  |
| C  | -2.462228 | -4.548537 | 0.315779  |
| H  | -0.387373 | -5.104205 | 0.181880  |
| H  | -4.399566 | -3.629993 | 0.528894  |
| H  | -2.833159 | -5.566366 | 0.407978  |
| N  | -3.079125 | 0.158318  | 0.353853  |
| C  | -3.728310 | -1.013198 | 0.352039  |
| C  | -3.696686 | 1.346815  | 0.341871  |
| C  | -5.118776 | -1.024841 | 0.435187  |
| C  | -5.086342 | 1.396008  | 0.424948  |
| C  | -5.787944 | 0.195067  | 0.487315  |
| H  | -5.680745 | -1.954585 | 0.441110  |
| H  | -5.622920 | 2.340686  | 0.423458  |
| H  | -6.872989 | 0.210234  | 0.552132  |
| N  | -1.445301 | 2.208711  | 0.023086  |
| C  | -0.558299 | 3.227740  | 0.041489  |
| C  | -2.777877 | 2.492258  | 0.219953  |
| C  | -0.993641 | 4.554443  | 0.146161  |
| C  | -3.240814 | 3.792292  | 0.332897  |
| C  | -2.337651 | 4.846773  | 0.269274  |
| H  | -0.247726 | 5.345776  | 0.138791  |
| H  | -4.299119 | 3.981628  | 0.487447  |
| H  | -2.681320 | 5.875328  | 0.346728  |
| C  | 0.688268  | 0.103781  | -1.195216 |
| H  | 0.746631  | 0.989329  | -1.843992 |
| H  | 1.587916  | 0.089598  | -0.561714 |
| H  | 0.719799  | -0.782288 | -1.845248 |
| Pt | -1.114402 | 0.130130  | -0.180693 |
| C  | 0.906206  | 2.958395  | -0.011728 |
| H  | 1.153758  | 2.016809  | 0.486189  |
| H  | 1.267099  | 2.899066  | -1.045913 |
| H  | 1.447174  | 3.775685  | 0.477121  |
| C  | 0.828623  | -2.751116 | -0.004593 |
| H  | 1.182021  | -2.703557 | -1.041970 |
| H  | 1.106585  | -1.815846 | 0.489035  |

H 1.350782 -3.581957 0.481687

Complex 4 <sup>3</sup>a

E = -979.361994

Number of negative frequencies = 0

|    |           |           |           |
|----|-----------|-----------|-----------|
| N  | -1.424421 | -1.949587 | 0.336991  |
| C  | -0.544632 | -2.976030 | 0.295529  |
| C  | -2.771854 | -2.195788 | 0.240039  |
| C  | -0.989887 | -4.286521 | 0.160665  |
| C  | -3.250914 | -3.494304 | 0.085216  |
| C  | -2.353033 | -4.549580 | 0.045592  |
| H  | -0.261930 | -5.094648 | 0.150564  |
| H  | -4.318646 | -3.673895 | -0.011777 |
| H  | -2.710805 | -5.569569 | -0.074048 |
| N  | -3.015564 | 0.157000  | 0.223586  |
| C  | -3.654662 | -1.029595 | 0.320480  |
| C  | -3.620849 | 1.361421  | 0.313059  |
| C  | -5.035181 | -1.028886 | 0.495326  |
| C  | -5.000667 | 1.399902  | 0.489416  |
| C  | -5.701081 | 0.195330  | 0.576322  |
| H  | -5.590871 | -1.959207 | 0.585456  |
| H  | -5.530741 | 2.345421  | 0.575838  |
| H  | -6.777676 | 0.211297  | 0.726835  |
| N  | -1.364482 | 2.221425  | 0.303538  |
| C  | -0.459356 | 3.225248  | 0.253834  |
| C  | -2.706136 | 2.502356  | 0.222714  |
| C  | -0.873345 | 4.547436  | 0.130156  |
| C  | -3.153835 | 3.813099  | 0.078225  |
| C  | -2.230338 | 4.845693  | 0.033886  |
| H  | -0.125332 | 5.336892  | 0.115262  |
| H  | -4.217690 | 4.020278  | -0.004293 |
| H  | -2.563131 | 5.875359  | -0.074184 |
| C  | -0.000762 | 0.096736  | -1.679040 |
| H  | -0.281715 | 0.997986  | -2.235230 |
| H  | 1.079720  | 0.085916  | -1.472246 |
| H  | -0.302668 | -0.808995 | -2.216839 |
| Pt | -0.958702 | 0.127434  | 0.200336  |
| C  | 0.982850  | 2.860020  | 0.347105  |
| H  | 1.150623  | 2.129600  | 1.150528  |
| H  | 1.327982  | 2.399719  | -0.588849 |
| H  | 1.600825  | 3.743583  | 0.537924  |
| C  | 0.903471  | -2.643174 | 0.408420  |
| H  | 1.271623  | -2.193670 | -0.524197 |
| H  | 1.073596  | -1.912293 | 1.211036  |
| H  | 1.499479  | -3.538962 | 0.611719  |

Complex 4 c

E = -1129.660962

Number of negative frequencies = 0

|   |           |           |          |
|---|-----------|-----------|----------|
| N | -1.469369 | -1.900699 | 0.196932 |
| C | -0.584426 | -2.918045 | 0.155464 |
| C | -2.819358 | -2.161527 | 0.182861 |

|    |           |           |           |
|----|-----------|-----------|-----------|
| C  | -1.045485 | -4.240287 | 0.159096  |
| C  | -3.300814 | -3.458059 | 0.178350  |
| C  | -2.398895 | -4.516687 | 0.179419  |
| H  | -0.312777 | -5.042900 | 0.135846  |
| H  | -4.371241 | -3.641488 | 0.172270  |
| H  | -2.756055 | -5.543341 | 0.182072  |
| N  | -3.093441 | 0.179751  | 0.189704  |
| C  | -3.723571 | -1.001083 | 0.153335  |
| C  | -3.699548 | 1.373437  | 0.170877  |
| C  | -5.113830 | -1.012452 | 0.083953  |
| C  | -5.089316 | 1.413699  | 0.101457  |
| C  | -5.784662 | 0.207810  | 0.058471  |
| H  | -5.671987 | -1.943481 | 0.049070  |
| H  | -5.628584 | 2.356261  | 0.079940  |
| H  | -6.869965 | 0.219467  | 0.002568  |
| N  | -1.427035 | 2.222494  | 0.231607  |
| C  | -0.519106 | 3.220332  | 0.214728  |
| C  | -2.770743 | 2.513125  | 0.220386  |
| C  | -0.950183 | 4.552259  | 0.244544  |
| C  | -3.222752 | 3.820107  | 0.240201  |
| C  | -2.297321 | 4.857949  | 0.265570  |
| H  | -0.199483 | 5.338408  | 0.242086  |
| H  | -4.288493 | 4.028907  | 0.235980  |
| H  | -2.631446 | 5.892089  | 0.288512  |
| C  | -1.106536 | 0.172121  | -1.817291 |
| H  | -1.604823 | 1.081357  | -2.170692 |
| H  | -0.056417 | 0.161216  | -2.131320 |
| H  | -1.628175 | -0.718285 | -2.184631 |
| Pt | -1.088575 | 0.156399  | 0.277293  |
| O  | 0.077048  | 0.133235  | 2.126445  |
| O  | 0.790484  | 0.125903  | 0.910735  |
| C  | 0.931600  | 2.906176  | 0.139502  |
| H  | 1.248926  | 2.306446  | 0.998509  |
| H  | 1.150726  | 2.304132  | -0.752061 |
| H  | 1.514069  | 3.830800  | 0.092935  |
| C  | 0.873275  | -2.637788 | 0.080608  |
| H  | 1.102757  | -2.004360 | -0.785860 |
| H  | 1.213260  | -2.085737 | 0.962526  |
| H  | 1.429637  | -3.575198 | -0.009703 |

Complex 4 TS<sub>1</sub>

E = -1129.613881

Number of negative frequencies = 1

|   |           |           |           |
|---|-----------|-----------|-----------|
| N | -1.531649 | -1.946823 | 0.181149  |
| C | -0.706763 | -3.018633 | 0.263268  |
| C | -2.872261 | -2.158845 | -0.038405 |
| C | -1.201153 | -4.308829 | 0.039561  |
| C | -3.388650 | -3.423880 | -0.263055 |
| C | -2.536262 | -4.519251 | -0.245203 |
| H | -0.508428 | -5.144161 | 0.101873  |
| H | -4.450348 | -3.553561 | -0.450252 |
| H | -2.918095 | -5.520306 | -0.428990 |

|    |           |           |           |
|----|-----------|-----------|-----------|
| N  | -3.085611 | 0.186036  | 0.151312  |
| C  | -3.743939 | -0.982378 | 0.026223  |
| C  | -3.707296 | 1.369064  | 0.299510  |
| C  | -5.134123 | -0.985803 | 0.025023  |
| C  | -5.098638 | 1.410634  | 0.319558  |
| C  | -5.806842 | 0.223423  | 0.173970  |
| H  | -5.692796 | -1.911848 | -0.072881 |
| H  | -5.628537 | 2.351004  | 0.438355  |
| H  | -6.893415 | 0.238849  | 0.181915  |
| N  | -1.460661 | 2.250995  | 0.195493  |
| C  | -0.616249 | 3.298675  | 0.046046  |
| C  | -2.798783 | 2.514812  | 0.370981  |
| C  | -1.069108 | 4.610514  | 0.242824  |
| C  | -3.282733 | 3.799880  | 0.546841  |
| C  | -2.396335 | 4.869036  | 0.520197  |
| H  | -0.350481 | 5.421130  | 0.151139  |
| H  | -4.344035 | 3.967433  | 0.703752  |
| H  | -2.748865 | 5.885219  | 0.677980  |
| C  | 0.623533  | 0.056139  | -1.449283 |
| H  | -0.073905 | 0.612922  | -2.081392 |
| H  | 1.596017  | 0.526614  | -1.333116 |
| H  | 0.663683  | -1.010433 | -1.663599 |
| Pt | -1.110945 | 0.124975  | 0.243921  |
| O  | 1.487409  | 0.861779  | 1.314042  |
| O  | 0.876770  | -0.126023 | 0.676663  |
| C  | 0.778537  | 3.090517  | -0.413195 |
| H  | 1.281685  | 2.288895  | 0.149283  |
| H  | 0.775328  | 2.826213  | -1.479205 |
| H  | 1.353708  | 4.015568  | -0.305433 |
| C  | 0.725670  | -2.866171 | 0.639207  |
| H  | 1.306827  | -2.329206 | -0.116676 |
| H  | 0.823433  | -2.296462 | 1.569565  |
| H  | 1.174270  | -3.854250 | 0.776438  |

Complex 4 e

E = -1129.644287

Number of negative frequencies = 0

|   |           |           |          |
|---|-----------|-----------|----------|
| N | -1.422421 | -1.962798 | 0.171463 |
| C | -0.577150 | -3.015228 | 0.176423 |
| C | -2.773283 | -2.178685 | 0.233449 |
| C | -1.075941 | -4.320402 | 0.240133 |
| C | -3.300188 | -3.459677 | 0.298481 |
| C | -2.438060 | -4.548778 | 0.300787 |
| H | -0.370036 | -5.147239 | 0.248658 |
| H | -4.374309 | -3.609385 | 0.351453 |
| H | -2.831588 | -5.560940 | 0.353469 |
| N | -3.007975 | 0.184354  | 0.209209 |
| C | -3.649367 | -0.995217 | 0.222137 |
| C | -3.630887 | 1.369165  | 0.097369 |
| C | -5.040944 | -1.007438 | 0.180211 |
| C | -5.021651 | 1.407077  | 0.044966 |
| C | -5.719137 | 0.205733  | 0.098935 |



|    |           |           |           |
|----|-----------|-----------|-----------|
| H  | -5.598428 | -1.939199 | 0.192063  |
| H  | -5.556723 | 2.348825  | -0.038057 |
| H  | -6.805333 | 0.212208  | 0.061103  |
| N  | -1.386428 | 2.243633  | 0.205952  |
| C  | -0.506019 | 3.251917  | 0.408681  |
| C  | -2.723976 | 2.521094  | 0.067942  |
| C  | -0.942049 | 4.579223  | 0.309828  |
| C  | -3.183743 | 3.822330  | -0.022441 |
| C  | -2.270788 | 4.869760  | 0.065478  |
| H  | -0.211274 | 5.372677  | 0.447876  |
| H  | -4.244615 | 4.021605  | -0.144016 |
| H  | -2.607487 | 5.900223  | -0.016662 |
| C  | -1.330783 | 0.173941  | -2.025441 |
| H  | -1.866599 | 1.097578  | -2.267977 |
| H  | -0.310370 | 0.171751  | -2.424358 |
| H  | -1.913868 | -0.713716 | -2.291060 |
| Pt | -0.978520 | 0.174734  | 0.012738  |
| O  | 1.482406  | 0.876944  | -1.169956 |
| O  | 0.943044  | 0.003018  | -0.295212 |
| C  | 0.891709  | 2.937425  | 0.774527  |
| H  | 0.913950  | 2.242503  | 1.625487  |
| H  | 1.410159  | 2.418710  | -0.055343 |
| H  | 1.431997  | 3.849779  | 1.042884  |
| C  | 0.891148  | -2.787246 | 0.126452  |
| H  | 1.179388  | -2.269743 | -0.795400 |
| H  | 1.219832  | -2.149167 | 0.955449  |
| H  | 1.420391  | -3.743031 | 0.183886  |

Complex 4 TS<sub>3</sub>

E = -1129.607589

Number of negative frequencies = 0

|   |           |           |          |
|---|-----------|-----------|----------|
| N | -1.717303 | -1.974971 | 0.512157 |
| C | -0.872880 | -3.024157 | 0.589114 |
| C | -3.067370 | -2.188164 | 0.447480 |
| C | -1.372582 | -4.330248 | 0.545500 |
| C | -3.596996 | -3.467433 | 0.409392 |
| C | -2.733150 | -4.556950 | 0.445130 |
| H | -0.670390 | -5.158613 | 0.598267 |
| H | -4.671220 | -3.616556 | 0.352148 |
| H | -3.126281 | -5.569827 | 0.406683 |
| N | -3.239072 | 0.175839  | 0.442839 |
| C | -3.917429 | -0.986598 | 0.446288 |
| C | -3.834780 | 1.381307  | 0.444249 |
| C | -5.307977 | -0.967614 | 0.456805 |
| C | -5.226089 | 1.447095  | 0.452420 |
| C | -5.955811 | 0.263601  | 0.458010 |
| H | -5.883977 | -1.888165 | 0.466196 |
| H | -5.741256 | 2.402948  | 0.461141 |
| H | -7.041976 | 0.301353  | 0.467220 |
| N | -1.588152 | 2.260029  | 0.587037 |
| C | -0.706848 | 3.262908  | 0.757910 |
| C | -2.917956 | 2.536244  | 0.474266 |

|    |           |           |           |
|----|-----------|-----------|-----------|
| C  | -1.141518 | 4.593401  | 0.740366  |
| C  | -3.390610 | 3.840182  | 0.442220  |
| C  | -2.481749 | 4.885888  | 0.560065  |
| H  | -0.409022 | 5.385638  | 0.876385  |
| H  | -4.451563 | 4.044136  | 0.331800  |
| H  | -2.825415 | 5.917214  | 0.532781  |
| C  | -1.281776 | -0.027664 | -1.980832 |
| H  | -2.338116 | -0.287064 | -1.858492 |
| H  | -1.145449 | 0.876821  | -2.567040 |
| H  | -0.650249 | -0.865201 | -2.268548 |
| Pt | -1.236810 | 0.078947  | 0.356341  |
| O  | 0.560580  | 0.811188  | -1.180366 |
| O  | 0.720699  | 0.042390  | -0.023343 |
| C  | 0.725281  | 2.934651  | 0.990226  |
| H  | 0.823942  | 2.219444  | 1.816325  |
| H  | 1.142345  | 2.447257  | 0.100169  |
| H  | 1.294078  | 3.838701  | 1.229133  |
| C  | 0.582134  | -2.771582 | 0.748808  |
| H  | 0.967645  | -2.158320 | -0.074624 |
| H  | 0.768961  | -2.196105 | 1.665542  |
| H  | 1.132647  | -3.715135 | 0.805900  |

Complex 4 f

E = -1129.696646

Number of negative frequencies = 1

|   |           |           |           |
|---|-----------|-----------|-----------|
| N | -1.534149 | -1.946823 | 0.186149  |
| C | -0.709263 | -3.018633 | 0.265768  |
| C | -2.872261 | -2.158845 | -0.038405 |
| C | -1.201153 | -4.308829 | 0.039561  |
| C | -3.388650 | -3.423880 | -0.263055 |
| C | -2.536262 | -4.519251 | -0.245203 |
| H | -0.508428 | -5.144161 | 0.099373  |
| H | -4.450348 | -3.553561 | -0.452752 |
| H | -2.918095 | -5.520306 | -0.428990 |
| N | -3.083111 | 0.186036  | 0.146312  |
| C | -3.743939 | -0.982378 | 0.026223  |
| C | -3.707296 | 1.369064  | 0.299510  |
| C | -5.134123 | -0.985803 | 0.025023  |
| C | -5.098638 | 1.410634  | 0.319558  |
| C | -5.806842 | 0.223423  | 0.173970  |
| H | -5.692796 | -1.911848 | -0.070381 |
| H | -5.626037 | 2.351004  | 0.438355  |
| H | -6.893415 | 0.238849  | 0.181915  |
| N | -1.460661 | 2.253495  | 0.197993  |
| C | -0.618749 | 3.301175  | 0.046046  |
| C | -2.798783 | 2.517312  | 0.373481  |
| C | -1.069108 | 4.613014  | 0.242824  |
| C | -3.285233 | 3.799880  | 0.546841  |
| C | -2.396335 | 4.869036  | 0.520197  |
| H | -0.352981 | 5.423630  | 0.148639  |
| H | -4.346535 | 3.969933  | 0.703752  |
| H | -2.748865 | 5.885219  | 0.677980  |

|    |           |           |           |
|----|-----------|-----------|-----------|
| C  | 0.741033  | 0.053639  | -1.429283 |
| H  | -0.016405 | 0.630422  | -1.978892 |
| H  | 1.726017  | 0.514114  | -1.393116 |
| H  | 0.736183  | -1.012933 | -1.648599 |
| Pt | -1.118445 | 0.124975  | 0.248921  |
| O  | 1.482409  | 0.849279  | 1.294042  |
| O  | 0.876770  | -0.113523 | 0.594163  |
| C  | 0.778537  | 3.093017  | -0.413195 |
| H  | 1.281685  | 2.288895  | 0.144283  |
| H  | 0.772828  | 2.836213  | -1.481705 |
| H  | 1.353708  | 4.015568  | -0.302933 |
| C  | 0.725670  | -2.866171 | 0.644207  |
| H  | 1.309327  | -2.339206 | -0.116676 |
| H  | 0.823433  | -2.291462 | 1.569565  |
| H  | 1.169270  | -3.854250 | 0.786438  |

Complex 4 TS<sub>4</sub>

E = -1129.678548

Number of negative frequencies = 1

|    |           |           |           |
|----|-----------|-----------|-----------|
| N  | -1.698871 | -2.033150 | 0.378659  |
| C  | -0.868422 | -3.102264 | 0.379193  |
| C  | -3.049821 | -2.246344 | 0.507399  |
| C  | -1.386326 | -4.396432 | 0.528290  |
| C  | -3.590836 | -3.511826 | 0.651659  |
| C  | -2.742398 | -4.611338 | 0.667202  |
| H  | -0.688882 | -5.230284 | 0.531274  |
| H  | -4.663494 | -3.639564 | 0.760746  |
| H  | -3.141666 | -5.615491 | 0.786386  |
| N  | -3.201944 | 0.108218  | 0.430752  |
| C  | -3.891852 | -1.053897 | 0.473433  |
| C  | -3.809481 | 1.309976  | 0.310765  |
| C  | -5.281135 | -1.026206 | 0.444649  |
| C  | -5.197542 | 1.373956  | 0.271059  |
| C  | -5.932834 | 0.197662  | 0.348142  |
| H  | -5.853949 | -1.947928 | 0.481280  |
| H  | -5.702930 | 2.330838  | 0.180712  |
| H  | -7.018417 | 0.234152  | 0.321799  |
| N  | -1.557373 | 2.133586  | 0.436861  |
| C  | -0.680914 | 3.147588  | 0.606825  |
| C  | -2.887411 | 2.440572  | 0.269686  |
| C  | -1.097519 | 4.477994  | 0.448678  |
| C  | -3.334619 | 3.741008  | 0.125446  |
| C  | -2.415080 | 4.783175  | 0.180163  |
| H  | -0.350695 | 5.260487  | 0.565802  |
| H  | -4.390554 | 3.944520  | -0.025072 |
| H  | -2.737252 | 5.813265  | 0.050353  |
| C  | 1.470930  | 0.702261  | -1.371478 |
| H  | 1.187881  | 1.747384  | -1.193413 |
| H  | 2.546735  | 0.572899  | -1.190453 |
| H  | 1.226654  | 0.425048  | -2.403670 |
| Pt | -1.280092 | 0.033054  | 0.334289  |
| O  | 1.191290  | -0.069895 | 0.851133  |

|   |          |           |           |
|---|----------|-----------|-----------|
| O | 0.767221 | -0.198790 | -0.544342 |
| C | 0.717169 | 2.905230  | 1.053789  |
| H | 0.823568 | 3.324339  | 2.065039  |
| H | 0.981411 | 1.841580  | 1.085123  |
| H | 1.427159 | 3.448753  | 0.416641  |
| C | 0.596552 | -2.938740 | 0.204732  |
| H | 0.827549 | -2.733741 | -0.848522 |
| H | 0.985701 | -2.086703 | 0.777554  |
| H | 1.107841 | -3.862436 | 0.493028  |

Complex 4 g

E = -1129.731870

Number of negative frequencies = 0

|    |           |           |           |
|----|-----------|-----------|-----------|
| N  | -2.219629 | -1.905824 | 0.263727  |
| C  | -1.356870 | -2.943126 | 0.193964  |
| C  | -3.556351 | -2.164677 | 0.436944  |
| C  | -1.825187 | -4.261531 | 0.273805  |
| C  | -4.051678 | -3.453884 | 0.524573  |
| C  | -3.170495 | -4.525285 | 0.435985  |
| H  | -1.102651 | -5.071300 | 0.208821  |
| H  | -5.114951 | -3.624820 | 0.663599  |
| H  | -3.535799 | -5.547296 | 0.499539  |
| N  | -3.804439 | 0.182886  | 0.453974  |
| C  | -4.443063 | -0.997434 | 0.532731  |
| C  | -4.438250 | 1.367762  | 0.497554  |
| C  | -5.826210 | -1.017397 | 0.682783  |
| C  | -5.821297 | 1.397859  | 0.646219  |
| C  | -6.509132 | 0.192773  | 0.740570  |
| H  | -6.370709 | -1.954568 | 0.748748  |
| H  | -6.362198 | 2.338704  | 0.683346  |
| H  | -7.589957 | 0.196853  | 0.854891  |
| N  | -2.210111 | 2.257750  | 0.209961  |
| C  | -1.342016 | 3.288375  | 0.113611  |
| C  | -3.546392 | 2.527660  | 0.368714  |
| C  | -1.804722 | 4.610618  | 0.148176  |
| C  | -4.036241 | 3.821185  | 0.413485  |
| C  | -3.149797 | 4.885283  | 0.294108  |
| H  | -1.077978 | 5.414555  | 0.060707  |
| H  | -5.099372 | 4.000648  | 0.542927  |
| H  | -3.510358 | 5.910559  | 0.321905  |
| C  | 2.206049  | 0.167863  | 0.546008  |
| H  | 2.456314  | 1.059373  | -0.050777 |
| H  | 2.785660  | 0.173163  | 1.476814  |
| H  | 2.450694  | -0.734246 | -0.037019 |
| Pt | -1.862075 | 0.174514  | 0.163791  |
| O  | 0.856957  | 0.174798  | 0.934520  |
| O  | 0.102381  | 0.163746  | -0.301510 |
| C  | 0.114920  | 3.029598  | -0.014640 |
| H  | 0.467429  | 2.385768  | 0.800212  |
| H  | 0.337855  | 2.489894  | -0.941490 |
| H  | 0.666505  | 3.974531  | -0.002422 |
| C  | 0.100371  | -2.696390 | 0.046297  |

|   |          |           |           |
|---|----------|-----------|-----------|
| H | 0.318254 | -2.183512 | -0.896872 |
| H | 0.463953 | -2.033144 | 0.840318  |
| H | 0.646376 | -3.644098 | 0.079230  |

Complex 4 CP1

E = -1129.61656439

Number of negative frequencies = 1

|    |           |           |           |
|----|-----------|-----------|-----------|
| N  | -1.859877 | -1.938486 | 0.373345  |
| C  | -1.008855 | -2.988297 | 0.400477  |
| C  | -3.210127 | -2.180198 | 0.337203  |
| C  | -1.500309 | -4.298915 | 0.343158  |
| C  | -3.728043 | -3.463014 | 0.290575  |
| C  | -2.857096 | -4.545628 | 0.280211  |
| H  | -0.786499 | -5.118922 | 0.353201  |
| H  | -4.802064 | -3.620788 | 0.261439  |
| H  | -3.238439 | -5.562275 | 0.233019  |
| N  | -3.441601 | 0.173958  | 0.380735  |
| C  | -4.090762 | -1.003494 | 0.354257  |
| C  | -4.068816 | 1.362108  | 0.373451  |
| C  | -5.481824 | -1.014553 | 0.344891  |
| C  | -5.459901 | 1.400306  | 0.364481  |
| C  | -6.160368 | 0.199451  | 0.354965  |
| H  | -6.036944 | -1.947498 | 0.330336  |
| H  | -5.996443 | 2.344266  | 0.362213  |
| H  | -7.247133 | 0.209371  | 0.349128  |
| N  | -1.818319 | 2.240925  | 0.358678  |
| C  | -0.943267 | 3.270651  | 0.358552  |
| C  | -3.162397 | 2.517205  | 0.362460  |
| C  | -1.400669 | 4.594608  | 0.337619  |
| C  | -3.649460 | 3.812352  | 0.347155  |
| C  | -2.752474 | 4.874123  | 0.328134  |
| H  | -0.665501 | 5.395417  | 0.331281  |
| H  | -4.719694 | 3.995599  | 0.347140  |
| H  | -3.110382 | 5.900436  | 0.308551  |
| C  | 1.185045  | 0.344124  | -1.870183 |
| H  | 0.732683  | 1.283718  | -2.175269 |
| H  | 2.239492  | 0.326174  | -1.612664 |
| H  | 0.708459  | -0.576697 | -2.194857 |
| Pt | -1.471779 | 0.144176  | 0.355819  |
| O  | 1.250380  | 0.326867  | 1.285677  |
| O  | 0.554333  | -0.037353 | 0.224479  |
| C  | 0.516135  | 3.008604  | 0.403177  |
| H  | 0.792138  | 2.487055  | 1.328173  |
| H  | 0.828732  | 2.345544  | -0.409511 |
| H  | 1.073474  | 3.946840  | 0.335639  |
| C  | 0.462241  | -2.784664 | 0.508314  |
| H  | 0.867100  | -2.282312 | -0.377370 |
| H  | 0.716743  | -2.155937 | 1.368390  |
| H  | 0.958312  | -3.753745 | 0.618091  |

Complex 4 <sup>3</sup>c

E = -1129.658810

Number of negative frequencies = 0

|    |           |           |           |
|----|-----------|-----------|-----------|
| N  | -0.102542 | -2.264013 | -0.303658 |
| C  | 0.021629  | -3.426622 | 0.353401  |
| C  | -0.260739 | -2.245312 | -1.643148 |
| C  | -0.015594 | -4.640196 | -0.339532 |
| C  | -0.290471 | -3.421928 | -2.385957 |
| C  | -0.164842 | -4.634990 | -1.717846 |
| H  | 0.078735  | -5.573750 | 0.210880  |
| H  | -0.386405 | -3.401899 | -3.467699 |
| H  | -0.178408 | -5.568469 | -2.275937 |
| N  | -0.011431 | 0.156836  | -1.562401 |
| C  | -0.383053 | -0.918001 | -2.286781 |
| C  | -0.042877 | 1.404683  | -2.072960 |
| C  | -0.854072 | -0.753957 | -3.587667 |
| C  | -0.512606 | 1.612929  | -3.368127 |
| C  | -0.926364 | 0.524232  | -4.122929 |
| H  | -1.183681 | -1.609333 | -4.169567 |
| H  | -0.576063 | 2.614011  | -3.783111 |
| H  | -1.311028 | 0.673142  | -5.128766 |
| N  | 0.645973  | 2.221591  | 0.092434  |
| C  | 1.085289  | 3.163891  | 0.938782  |
| C  | 0.441744  | 2.506023  | -1.210172 |
| C  | 1.337861  | 4.462088  | 0.485724  |
| C  | 0.687991  | 3.778855  | -1.718044 |
| C  | 1.141225  | 4.767436  | -0.851841 |
| H  | 1.687238  | 5.214877  | 1.188921  |
| H  | 0.548942  | 4.003368  | -2.771363 |
| H  | 1.341070  | 5.769141  | -1.225531 |
| C  | 2.467153  | -0.424703 | -0.061288 |
| H  | 2.806254  | -1.287785 | 0.524340  |
| H  | 2.538351  | -0.627508 | -1.135757 |
| H  | 3.028177  | 0.479240  | 0.205191  |
| Pt | 0.510014  | -0.108985 | 0.452596  |
| O  | 1.115504  | -0.379423 | 2.379414  |
| O  | 0.101916  | -0.278367 | 3.175728  |
| C  | 1.280505  | 2.783087  | 2.367336  |
| H  | 0.350250  | 2.385910  | 2.793331  |
| H  | 2.035288  | 1.991109  | 2.461995  |
| H  | 1.600050  | 3.643911  | 2.963168  |
| C  | 0.195633  | -3.374799 | 1.833479  |
| H  | 1.142333  | -2.884193 | 2.097566  |
| H  | -0.604892 | -2.786435 | 2.299327  |
| H  | 0.194271  | -4.380673 | 2.265209  |

Complex 4 TS<sub>5</sub>

E = -1129.637802

Number of negative frequencies = 1

|   |           |           |           |
|---|-----------|-----------|-----------|
| N | 0.292968  | -2.105451 | -0.534372 |
| C | 0.376599  | -3.220998 | 0.221850  |
| C | -0.301624 | -2.178848 | -1.775125 |
| C | -0.081712 | -4.448714 | -0.273299 |
| C | -0.762174 | -3.377299 | -2.289860 |

|    |           |           |           |
|----|-----------|-----------|-----------|
| C  | -0.640273 | -4.537254 | -1.532462 |
| H  | 0.005291  | -5.327581 | 0.360523  |
| H  | -1.231875 | -3.404556 | -3.268922 |
| H  | -0.998600 | -5.488324 | -1.918643 |
| N  | -0.162408 | 0.176621  | -1.821218 |
| C  | -0.448971 | -0.920998 | -2.531539 |
| C  | -0.103634 | 1.412816  | -2.332351 |
| C  | -0.815690 | -0.783809 | -3.867930 |
| C  | -0.462687 | 1.609163  | -3.663362 |
| C  | -0.833973 | 0.497154  | -4.416089 |
| H  | -1.060313 | -1.645110 | -4.483088 |
| H  | -0.434640 | 2.593626  | -4.121570 |
| H  | -1.113186 | 0.627583  | -5.458671 |
| N  | 0.855525  | 1.991099  | -0.169364 |
| C  | 1.202752  | 2.891769  | 0.773276  |
| C  | 0.375716  | 2.434194  | -1.381378 |
| C  | 1.161473  | 4.263027  | 0.489799  |
| C  | 0.319484  | 3.781761  | -1.688475 |
| C  | 0.738593  | 4.713972  | -0.744430 |
| H  | 1.462072  | 4.960849  | 1.267697  |
| H  | -0.066355 | 4.106723  | -2.650586 |
| H  | 0.707743  | 5.777242  | -0.968955 |
| C  | 2.455467  | -0.442592 | 1.193165  |
| H  | 2.955801  | -1.355798 | 0.846085  |
| H  | 3.138341  | 0.404614  | 1.050684  |
| H  | 2.197063  | -0.537044 | 2.254011  |
| Pt | 0.824488  | -0.122178 | -0.044374 |
| O  | -0.283813 | -0.183245 | 1.939640  |
| O  | -1.349798 | 0.503011  | 1.863326  |
| C  | 1.611492  | 2.444329  | 2.134220  |
| H  | 1.062390  | 1.547233  | 2.437376  |
| H  | 2.685165  | 2.219835  | 2.171617  |
| H  | 1.421838  | 3.246066  | 2.855411  |
| C  | 0.945087  | -3.164273 | 1.597215  |
| H  | 2.040993  | -3.134236 | 1.572813  |
| H  | 0.592195  | -2.279540 | 2.135977  |
| H  | 0.652532  | -4.058919 | 2.155779  |

Complex 4 h

E = -1129.638306

Number of negative frequencies = 0

|   |           |           |           |
|---|-----------|-----------|-----------|
| N | 0.337361  | -2.114186 | -0.537349 |
| C | 0.403021  | -3.225071 | 0.226852  |
| C | -0.286019 | -2.181205 | -1.763865 |
| C | -0.078393 | -4.448284 | -0.256700 |
| C | -0.770841 | -3.375046 | -2.267473 |
| C | -0.649937 | -4.534933 | -1.510249 |
| H | -0.000652 | -5.324491 | 0.382083  |
| H | -1.262403 | -3.397261 | -3.235888 |
| H | -1.024488 | -5.482760 | -1.888999 |
| N | -0.140947 | 0.172429  | -1.802933 |
| C | -0.453155 | -0.919423 | -2.509552 |

|    |           |           |           |
|----|-----------|-----------|-----------|
| C  | -0.107532 | 1.410338  | -2.309470 |
| C  | -0.869677 | -0.776496 | -3.831022 |
| C  | -0.517725 | 1.614734  | -3.624777 |
| C  | -0.911865 | 0.506844  | -4.371263 |
| H  | -1.134622 | -1.635655 | -4.440797 |
| H  | -0.513457 | 2.602781  | -4.076034 |
| H  | -1.231021 | 0.642782  | -5.401609 |
| N  | 0.902619  | 1.985619  | -0.169491 |
| C  | 1.227726  | 2.885060  | 0.782174  |
| C  | 0.391805  | 2.430118  | -1.367307 |
| C  | 1.159276  | 4.257581  | 0.511743  |
| C  | 0.309432  | 3.779318  | -1.663156 |
| C  | 0.724898  | 4.711114  | -0.717773 |
| H  | 1.446347  | 4.954358  | 1.295562  |
| H  | -0.095535 | 4.105212  | -2.616967 |
| H  | 0.676415  | 5.775387  | -0.934292 |
| C  | 2.458718  | -0.452005 | 1.283327  |
| H  | 2.970314  | -1.384402 | 1.012821  |
| H  | 3.171276  | 0.375528  | 1.170432  |
| H  | 2.128871  | -0.506125 | 2.328051  |
| Pt | 0.924367  | -0.136267 | -0.068239 |
| O  | -0.502478 | -0.109083 | 1.677010  |
| O  | -1.540549 | 0.572043  | 1.418401  |
| C  | 1.626633  | 2.432643  | 2.144031  |
| H  | 1.041773  | 1.558364  | 2.448574  |
| H  | 2.689815  | 2.166796  | 2.185897  |
| H  | 1.462799  | 3.242321  | 2.862342  |
| C  | 0.970828  | -3.170001 | 1.602600  |
| H  | 2.066719  | -3.202706 | 1.582517  |
| H  | 0.666716  | -2.258676 | 2.125629  |
| H  | 0.627911  | -4.036373 | 2.177061  |

Complex 4 TS<sub>6</sub>

E = -1129.643564

Number of negative frequencies = 1

|   |           |           |           |
|---|-----------|-----------|-----------|
| N | 0.157109  | -2.135091 | -0.345675 |
| C | 0.242084  | -3.269826 | 0.379975  |
| C | -0.386827 | -2.177846 | -1.602963 |
| C | -0.228831 | -4.480463 | -0.134523 |
| C | -0.878600 | -3.359226 | -2.139939 |
| C | -0.802011 | -4.528362 | -1.394034 |
| H | -0.139047 | -5.377455 | 0.473422  |
| H | -1.332541 | -3.357589 | -3.127526 |
| H | -1.185621 | -5.463965 | -1.794339 |
| N | -0.311972 | 0.190972  | -1.638686 |
| C | -0.386832 | -0.925972 | -2.379310 |
| C | -0.065857 | 1.394245  | -2.180459 |
| C | -0.360137 | -0.845046 | -3.769555 |
| C | -0.031809 | 1.541653  | -3.565069 |
| C | -0.207981 | 0.408966  | -4.357543 |
| H | -0.406715 | -1.739251 | -4.386345 |
| H | 0.173690  | 2.505571  | -4.023968 |



|    |           |           |           |
|----|-----------|-----------|-----------|
| H  | -0.165411 | 0.496140  | -5.440397 |
| N  | 0.730930  | 2.051139  | 0.014833  |
| C  | 1.116523  | 2.978678  | 0.916080  |
| C  | 0.256992  | 2.451324  | -1.206158 |
| C  | 1.020993  | 4.340617  | 0.620562  |
| C  | 0.132904  | 3.795826  | -1.528797 |
| C  | 0.518158  | 4.755213  | -0.601224 |
| H  | 1.351010  | 5.062209  | 1.364001  |
| H  | -0.274191 | 4.088986  | -2.492989 |
| H  | 0.428876  | 5.813634  | -0.834239 |
| C  | 2.574344  | -0.357443 | 0.065698  |
| H  | 2.728198  | -1.249529 | -0.551232 |
| H  | 2.968043  | 0.535021  | -0.433199 |
| H  | 3.019562  | -0.483009 | 1.060609  |
| Pt | 0.557924  | -0.102268 | 0.315252  |
| O  | 1.007664  | -0.355815 | 2.551575  |
| O  | -0.101802 | -0.328639 | 3.178069  |
| C  | 0.837810  | -3.218441 | 1.743131  |
| H  | 1.746065  | -2.606072 | 1.763365  |
| H  | 0.132128  | -2.770420 | 2.454759  |
| H  | 1.078094  | -4.227561 | 2.092235  |
| C  | 1.649190  | 2.530226  | 2.231644  |
| H  | 0.844796  | 2.124594  | 2.857566  |
| H  | 2.393906  | 1.735305  | 2.109829  |
| H  | 2.108731  | 3.368538  | 2.764420  |

Complex 4 TS<sub>2</sub>

E = -1129.622686

Number of negative frequencies = 1

|   |           |           |           |
|---|-----------|-----------|-----------|
| N | 1.694184  | -1.684460 | -1.512053 |
| C | 2.797557  | -2.440215 | -1.332206 |
| C | 1.301948  | -1.312320 | -2.754640 |
| C | 3.541513  | -2.853462 | -2.437834 |
| C | 2.016887  | -1.697919 | -3.879648 |
| C | 3.152492  | -2.481570 | -3.714878 |
| H | 4.426408  | -3.464112 | -2.277442 |
| H | 1.698715  | -1.398073 | -4.873314 |
| H | 3.729086  | -2.796173 | -4.581386 |
| N | -0.501458 | -0.260189 | -1.600696 |
| C | 0.082422  | -0.498289 | -2.800929 |
| C | -1.651351 | 0.446731  | -1.544922 |
| C | -0.455479 | -0.000060 | -3.981598 |
| C | -2.219798 | 0.978482  | -2.701105 |
| C | -1.615969 | 0.758442  | -3.929251 |
| H | 0.025404  | -0.195752 | -4.935003 |
| H | -3.149098 | 1.537440  | -2.624640 |
| H | -2.051224 | 1.159569  | -4.841105 |
| N | -2.490766 | -0.456214 | 0.508736  |
| C | -3.084954 | -0.337516 | 1.702973  |
| C | -2.328474 | 0.637960  | -0.240946 |
| C | -3.541145 | 0.898961  | 2.174013  |
| C | -2.769972 | 1.905144  | 0.140342  |

|    |           |           |           |
|----|-----------|-----------|-----------|
| C  | -3.386703 | 2.029086  | 1.381393  |
| H  | -4.014032 | 0.965646  | 3.152293  |
| H  | -2.607966 | 2.770524  | -0.499595 |
| H  | -3.734739 | 2.999714  | 1.729296  |
| C  | 0.681652  | 1.193410  | 1.153672  |
| H  | 0.950212  | 1.523056  | 0.146677  |
| H  | -0.253387 | 1.599434  | 1.534779  |
| H  | 1.507053  | 1.137817  | 1.858366  |
| Pt | 0.550497  | -0.975131 | 0.066689  |
| O  | 0.023523  | -0.578541 | 1.959605  |
| O  | 1.172774  | -1.358227 | 1.946567  |
| C  | -3.225847 | -1.590564 | 2.504848  |
| H  | -2.236024 | -2.036454 | 2.669938  |
| H  | -3.695777 | -1.403849 | 3.476638  |
| H  | -3.829420 | -2.329561 | 1.962137  |
| C  | 3.198610  | -2.804148 | 0.055035  |
| H  | 3.429799  | -1.904438 | 0.640152  |
| H  | 2.390908  | -3.331866 | 0.576851  |
| H  | 4.084209  | -3.446691 | 0.042500  |
